1 **The interaction between endogenous GABA, functional**  
2 **connectivity and behavioral flexibility is critically altered with**  
3 **advanced age**

---

4 Kirstin-Friederike Heise<sup>1,2\*</sup>, Laura Rueda-Delgado<sup>1,3</sup>, Sima Chalavi<sup>1,2</sup>, Bradley R. King<sup>1,2,4</sup>, Thiago  
5 Santos Monteiro<sup>1,2</sup>, Richard A. E. Edden<sup>5,6</sup>, Dante Mantini<sup>1,7</sup>, Stephan P. Swinnen<sup>1,2</sup>

6 <sup>1</sup> Department of Movement Sciences, Movement Control and Neuroplasticity Research Group,  
7 KU Leuven

8 <sup>2</sup> KU Leuven Brain Institute, Leuven, Belgium

9 <sup>3</sup> School of Psychology, Trinity College Dublin, Dublin 2, Ireland

10 <sup>4</sup> Department of Health & Kinesiology, College of Health, University of Utah, Salt Lake City,  
11 Utah, USA

12 <sup>5</sup> The Russell H. Morgan Department of Radiology and Radiological Science, The Johns  
13 Hopkins University School of Medicine, Baltimore, MD, USA

14 <sup>6</sup> F. M. Kirby Research Center for Functional Brain Imaging, Kennedy Krieger Institute,  
15 Baltimore, MD, USA

16 <sup>7</sup> Brain Imaging and Neural Dynamics Research Group, IRCCS San Camillo Hospital, Venice,  
17 Italy

18

19 \*Correspondence to

20 Kirstin-Friederike Heise

21 Movement Control and Neuroplasticity Research Group

22 KU Leuven

23 Tervuurse Vest 101; 3001 Leuven, Belgium

24 Email: [kirstin.heise@kuleuven.be](mailto:kirstin.heise@kuleuven.be)

25

## 26 **Abstract**

27 The flexible adjustment of ongoing behavior challenges the nervous system's dynamic control  
28 mechanisms and has shown to be specifically susceptible to age-related decline. Previous work links  
29 endogenous gamma-aminobutyric acid (GABA) with behavioral efficiency across perceptual and  
30 cognitive domains, with potentially the strongest impact on those behaviors that require a high level  
31 of dynamic control. Based on the integrated analyses of behavior and modulation of interhemispheric  
32 phase-based connectivity during dynamic motor state transitions and endogenous GABA  
33 concentration, we provide converging evidence for age-related differences in the behaviorally more  
34 beneficial state of endogenous GABA concentration. We suggest that the increased interhemispheric  
35 connectivity seen in the older adults represents a compensatory mechanism caused by rhythmic  
36 entrainment of neural populations in homotopic motor cortices. This mechanism appears to be most  
37 relevant in the presence of a less optimal tuning of the inhibitory tone to uphold the required  
38 flexibility of behavioral action.

## 39 **Abbreviations**

40 AP, anti-phase; DV, dependent variable; EEG, electroencephalography; GABA,  $\gamma$ -aminobutyric acid;  
41 GLMM, generalized linear mixed effects model; IP, in-phase; ISPC, inter-site phase clustering; IV,  
42 independent variable; MRS, magnetic resonance spectroscopy; M1, primary motor cortex; NAA, N-  
43 acetylaspartate; OCC, occipital cortex; SNR, signal-to-noise ratio.

44

## 45 Introduction

46 Flexibly adjusting ongoing behavior poses a specific challenge to the neural control mechanisms and  
47 this becomes particularly visible with increasing age <sup>1</sup>. Functional deficits in endogenous  $\gamma$ -  
48 aminobutyric acid (GABA)-mediated neural signaling represent one suspect mechanism among the  
49 many potential causes of age-related behavioral decline <sup>2</sup>. GABAergic interneurons are suggested to  
50 have a major role in scaling and fine-tuning neural oscillations [reviewed in <sup>3,4</sup>]. More specifically,  
51 GABAergic neurotransmission is believed to be an essential regulator of phase synchronization of  
52 neural oscillations [reviewed in <sup>5</sup>], which has been proposed to constitute one of the brain's main  
53 modes of communication <sup>6,7</sup>. Thus, phase-based connectivity is indicative of the time-sensitive  
54 modulation of inter-site neural communication and therefore serves as a proxy for the responsiveness  
55 of the neural system.

56 Previous work indicates that GABAergic synaptic mechanisms on the cortical level, evaluated at  
57 resting-state, predict the system's capacity for dynamic event-related modulation of cortical  
58 inhibition, and that this is linked to efficient motor control <sup>8</sup>. This work suggests that, once baseline  
59 GABAergic neurotransmission is imbalanced, the system's responsiveness is impaired and this may  
60 have detrimental behavioral consequences. Such imbalance may occur at older age when disinhibition  
61 becomes more prominent. Experimental evidence for this association between age-related GABAergic  
62 dysfunction and declining behavior across perceptual and cognitive domains points towards a stronger  
63 impact on those types of behavior that require a high level of dynamic control [e.g. <sup>9-11</sup>]. Yet, lowered  
64 motor cortical GABA levels are found to correlate with age-related changes in sensorimotor  
65 connectivity and diminished motor control <sup>12</sup>. These recent findings suggest a broader link between  
66 GABA availability and connectivity as a read-out for neural communication with implications for  
67 behavioral efficiency. However, whether these phenomena are simply co-occurring or whether they  
68 can be attributed to underlying causal mechanisms still remains an open question.

69 Here, we chose a behavioral paradigm involving the dynamic control of transitions between  
70 dynamical motor states of varying complexity, which has shown to engage widespread, and in  
71 particular interhemispheric, neural communication within the sensorimotor system <sup>13,14</sup>. Our main

72 interest was to shed light on the nature of the interactions between task-related connectivity dynamics,  
73 behavior, and tuning of the motor-cortical inhibitory system in the course of healthy aging. Therefore,  
74 we employed a multimodal approach to fuse endogenous GABA levels with the dynamic modulation  
75 of interhemispheric motor-cortical phase synchronization in the context of motor-state transitions in  
76 neurotypical young and older volunteers.

## 77 **Results**

78 To investigate the impact of individual variations in baseline GABA levels for the association  
79 between interhemispheric motor-cortical connectivity and complex bimanual behavior, we used a  
80 cross-sectional multimodal approach. The participants underwent in total three sessions, including  
81 magnetic resonance spectroscopy (MRS) in the first session and the second session to familiarize  
82 themselves with the behavioral paradigm (motor state transitions). The third session followed 24  
83 hours after the familiarization and involved electroencephalography (EEG) during task performance.  
84 MRS data were used to extract the endogenous GABA concentration. EEG data served to compute the  
85 task-related functional connectivity metric based on the circular variance of frequency-specific phase  
86 angle differences alongside the behavioral parameters (Figure 1, see Materials and Methods section  
87 for details). While the unimodal analyses (neurochemical, neural, behavioral) served to verify  
88 expected age-differences, our primary interest was to integrate all three modalities to investigate the  
89 character of their interactions.

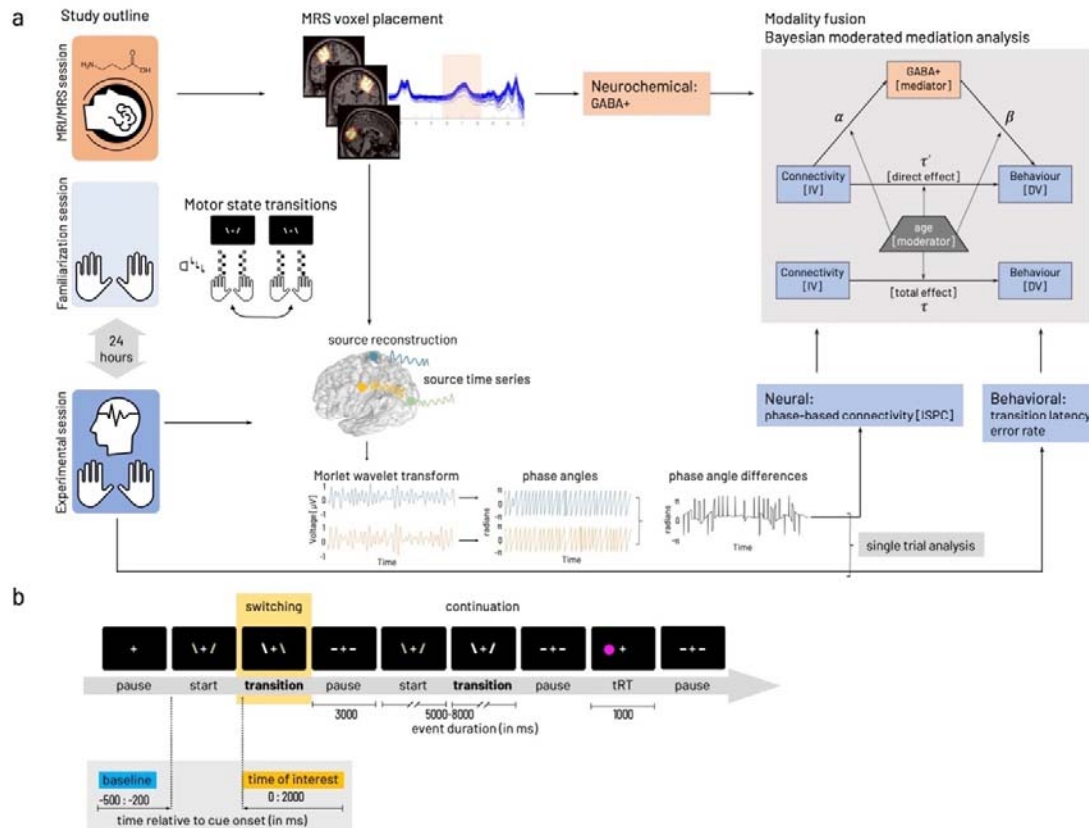

90  
 91 **Figure 1: Experimental procedures and parameters of interest.** *a* Study outline with MRI/MRS (session 1), task  
 92 familiarization (session 2) preceding the main experiment (session 3) including EEG during task performance. Edited MRS  
 93 and T1-weighted images were used to extract tissue-corrected GABA levels and additional macromolecules (GABA+) from  
 94 left and right primary motor and occipital voxels. The behavioral paradigm involved transitions between a stable (mirror-  
 95 symmetric in-phase tapping, left) and a less stable (anti-phase tapping, right) motor state. Task familiarization included  
 96 stimulus-response mapping and individual performance frequency adjustment. Performance in motor state transitions was  
 97 described with transition latency and error rate. The EEG signal was projected into source space based on the centroid  
 98 coordinates of the GABA voxels. Phase angles were computed based on spectrally decomposed (Morlet wavelet transform)  
 99 source time series. Phase angle differences between source signal pairs were used to compute connectivity (inter-site phase  
 100 clustering, ISPC) between cortical sources. Phase angle differences were associated with behavioral performance in a  
 101 single trial-based analysis. Then parameters of interest from the individual modalities (neurochemical, neural, behavioral)  
 102 were integrated with a Bayesian moderated mediation analysis estimated for interhemispheric motor-cortical connectivity as  
 103 independent variable [IV]. In both cases, dependent variable [DV] behavior was either median transition latency or  
 104 cumulative error rate. Details on formalization of model paths  $\alpha$ ,  $\beta$ ,  $\tau'$ ,  $\tau$  given in Methods. **b** Flow of events within the  
 105 behavioral paradigm. Phases of finger movement ('start', 'continuation', 'switching') were interleaved with rest phases  
 106 ('pause'). A randomly occurring reaction time task ('tRT'), a fast key press with either left or right thumb in response to  
 107 appearance of a circle on the side of the required response was interspersed with the other events with a 5% probability of  
 108 occurrence. Inlay highlights the time zones relevant for the analysis of behavioral data and EEG/EMG data analysis (time of  
 109 interest, yellow). Data collected in the within-trial pause (demarked in blue) was used as baseline for the EEG/EMG  
 110 analysis of the data from the time of interest (yellow). A high-resolution version of this figure can be accessed under  
 111 <https://figshare.com/s/aae99a05f0fab30304f2>

## 112 GABA+ concentration

113 To examine the endogenous motor-cortical GABA concentration, MRS data from left, right primary  
 114 motor cortex (M1), and a control region, i.e. the occipital cortex (OCC) were acquired in 22 older and  
 115 22 young adults. In two cases (one older, one young), the data of the right M1 were excluded from

116 further analysis due to motion artifacts and insufficient model fit. Consistency of the voxel placement  
117 across participants and individual traces of edited spectra for each voxel were visually inspected  
118 (Figure 2). Quantitative quality metrics were comparable to those published in recent studies from our  
119 and other groups<sup>15-17</sup> (for descriptive statistics see Supplementary Table 1).

120 A gamma generalized linear mixed model (GLMM, identity link) was fitted to predict GABA+ with  
121 GROUP (young, older) and VOXEL (left M1, right M1, OCC) as factors of interest. All quality  
122 metrics (see Methods for details) and raw grey matter fraction (GM fraction) were added as covariates  
123 (after mean-centering) to identify their influence on GABA+ levels and their potential interaction with  
124 voxel or group through stepwise backward selection. This procedure revealed that of all quality  
125 metrics only GABA Fit error interacted with voxel and raw GM fraction interacted with group  
126 (Supplementary Table 2), all other interactions (all  $p > .2$ ) were excluded from the final model. Of note,  
127 only interactions were removed during backward selection but all factors and covariates were kept in  
128 the final model to control for their influence. The final model (Supplementary Table 3) confirmed a  
129 significant effect of GABA signal-to-noise ratio (GABA SNR, Type II Wald  $X^2(1) = 6.74$ ,  $p < .01$ )  
130 and Frequency offset (Type II Wald  $X^2(1) = 17.20$ ,  $p < .0001$ ). Additionally, compared to the occipital  
131 voxel, both sensorimotor voxels tended to show higher GABA+ levels with increasing GABA Fit  
132 Error (VOXEL  $\times$  GABA Fit Error (centered), Type II Wald  $X^2(2) = 5.84$ ,  $p = .05$ ). Relative to the  
133 young, the older showed overall lower GABA+ levels with increasing GM fraction ( $\beta = -0.49 \pm 0.19$ ,  
134 95%CI [-0.86, -0.12],  $X^2 = -2.61$ ,  $p < .01$ , GROUP  $\times$  raw GM fraction (centered), Type II Wald  $X^2(1) =$   
135 6.82,  $p < .01$ , Figure 2d) across all voxels.

136 With reference categories young and occipital voxel, we found an overall average GABA+ level  
137 around 2.86 i.u. (intercept  $\beta = 2.86 \pm 0.26$ , 95% CI [2.34, 3.37],  $X^2 = 10.8$ ,  $p < .0001$ ). Based on the  
138 Type II Wald statistics, GABA+ was found to be significantly different between age groups and this  
139 was specific to the voxel (GROUP  $\times$  VOXEL  $X^2(2) = 9.57$ ,  $p < .01$ , Figure 2c). Specifically, marginal  
140 means contrast estimated for the individual parameter levels of the GROUP  $\times$  VOXEL interaction  
141 revealed lower GABA+ levels in both sensorimotor voxels compared to the occipital voxel in the  
142 older (OCC-LM1:  $\Delta\text{EMM} = 1.65 \pm 0.227$ , 95%CI [0.99, 2.32],  $z = 7.29$ ,  $p_{\text{holm}} < .0001$ ; OCC-RM1:

143  $\Delta\text{EMM}=1.564\pm 0.2$ , 95%CI [0.93, 2.20],  $z=7.27$ ,  $p_{\text{holm}} < .0001$ ) while the young showed no differences  
 144 between the voxels (marginal means contrasts given in Supplementary Table 4). Furthermore, the  
 145 older showed significantly lower GABA+ levels in both sensorimotor voxels compared to the young  
 146 (LM1:  $\Delta\text{EMM}=0.64\pm 0.15$ , 95%CI [0.21, 1.07],  $z=4.40$ ,  $p_{\text{holm}} < .0001$ ; RM1:  $\Delta\text{EMM}=0.55\pm 0.12$ ,  
 147 95%CI [0.19, 0.91],  $z=4.48$ ,  $p_{\text{holm}} < .0001$ ) but not the occipital voxel.  
 148 In short, controlling for quality metrics and raw grey matter fraction, we identified a relative reduction  
 149 of GABA+ levels in the older compared to the young, which was specific for both sensorimotor  
 150 voxels but not the occipital voxel.

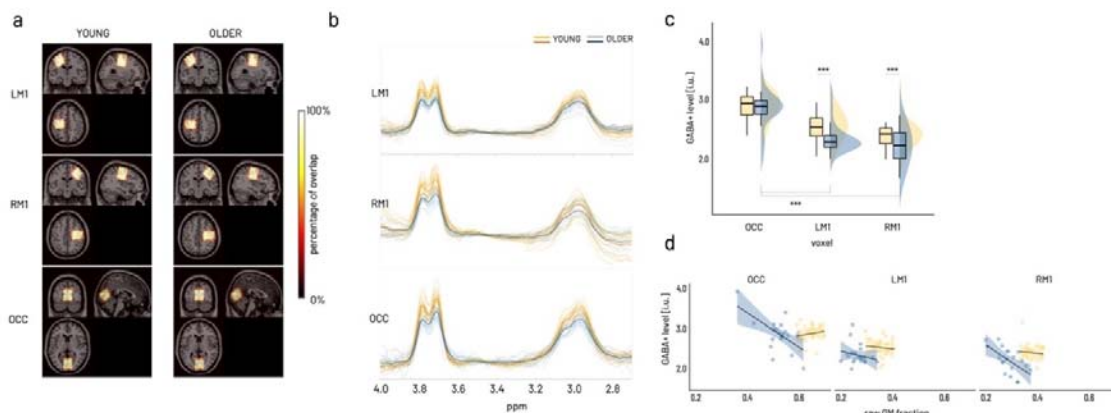

151  
 152 **Figure 2 GABA MRS results.** **a)** Sum of individual GABA voxels projected into MNI space overlaid on standard brain  
 153 template. Color coding indicates overlay agreement in percentage of all available images within group. Neurological  
 154 display, i.e. coronal and axial view with left side on the left and right side on the right of image. **b)** Individual edited spectra  
 155 for LM1 (top), RM1 (middle), and OCC voxel (bottom) color coded for older (blue) and young (yellow) participants. Darker  
 156 lines present average spectra per group (orange – young, dark blue – older). **c)** Boxplots (see Material and Methods for  
 157 represented group statistics) and distributions shown for the interaction effect of group and voxel on GABA+, which is  
 158 driven by the differences between the occipital voxel and both sensorimotor voxels within the older in addition to the  
 159 between age group differences for both sensorimotor voxels. Asterisks indicate significant effects of model derived marginal  
 160 mean contrasts corrected for multiple comparisons at  $***p_{\text{holm}} < .0001$ . **d)** Age-group specific effect of raw grey matter (GM)  
 161 fraction on GABA+ levels. Scatterplot (regression lines for subgroups with shading representing 95% CI) showing a relative  
 162 decrease in GABA+ levels with increasing raw GM fraction in the older across all voxels ( $p_{\text{holm}} < .0001$ ). A high-resolution  
 163 version of this figure can be accessed under <https://figshare.com/s/6ca09bf7c4185f3c3910>

## 164 Behavior

165 The control of transitions between motor-states was tested with a variation of an established paradigm  
 166 <sup>18–21</sup>, in which the participants had to rhythmically tap in individually adjusted pace with the index and  
 167 middle fingers of both hands and to control transitions between two coordinative patterns of different  
 168 complexity (Figure 1a). The behavioral data collected during the performance of the behavioral  
 169 paradigm was analyzed in a time window of 2000ms following the ‘switching’ cue. The time window



170 of interest for these parameters was based on previous work<sup>21</sup> and pilot testing in older participants  
 171 with the same task, which revealed that change in coordination mode is realized over an extended  
 172 period. Furthermore, these previous results showed that a simple binarization of the precision (correct  
 173 – wrong) does not reflect the ongoing adjustments made until the new coordination mode is mastered.  
 174 Therefore, we aimed at quantifying performance with respect to (1) the precision (*error rate*) and (2)  
 175 the speed (*transition latency*). Please see Methods for details about the behavioral paradigm and  
 176 parametrization of outcome parameters. On average 119±20.5 trials of individual transitions per  
 177 participant were subjected to the analysis including N= 21 young and N= 22 older participants  
 178 (descriptive statistics given in Supplementary Table 5).

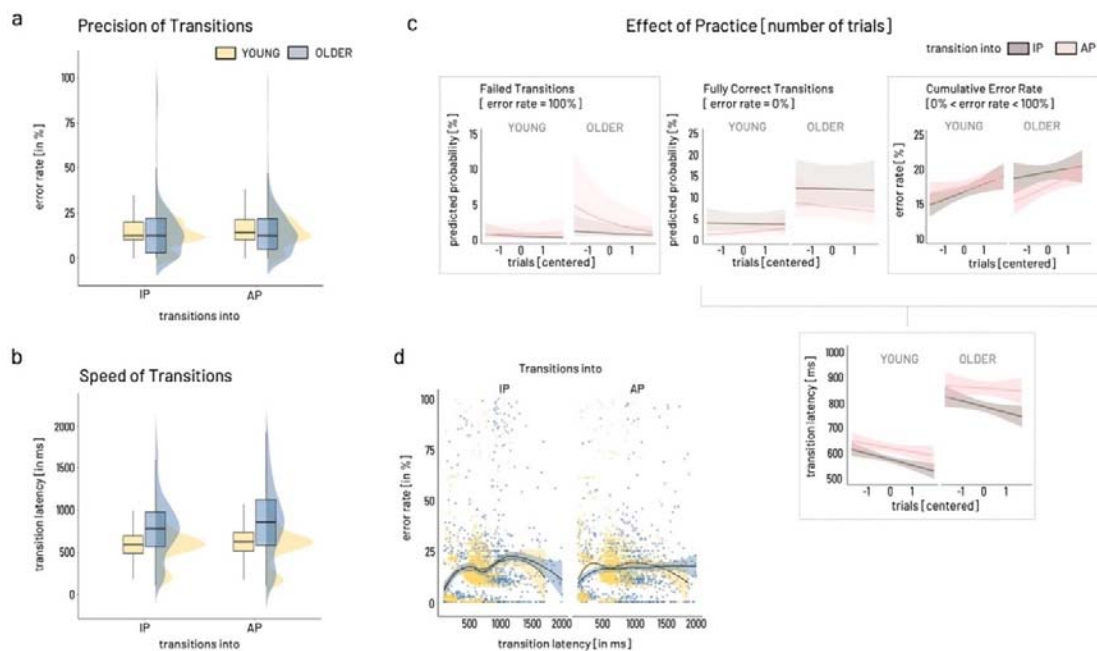

179  
 180 **Figure 3 Predictors for behavioral outcome.** *a*) Error rate. Boxplots and distributions for overall error rate given  
 181 separately for transition modes (IP: in-phase, AP: anti-phase) and age groups (blue: older, yellow: young). *b*) Transition  
 182 Latency. Color coding as in *a*). *c*) Effect of practice, i.e. number of trials (depicted as centered variable), are given for  
 183 Failed transitions (top left), Fully correct transitions (top middle), and Cumulative error rate (top right), and transition  
 184 latency (bottom, failed transitions excluded). Brown indicates transitions into IP mode, light pink depicting transitions into  
 185 AP. Frames around graphs indicate relevant modulation of the outcome over number of trials, i.e., for failed transitions,  
 186 cumulative error rate, and transition latency. Only in the case of failed transitions, older showed a significantly different  
 187 modulation over time for transitions into AP compared to the young with initially higher rate of trials with 100% error rate.  
 188 Cumulative error rate showed a comparable increase across trials while transition latency decreased comparably in the two  
 189 age groups and for both transition modes (into IP, into AP). *d*) For both groups and transitions modes (into IP, into AP), the relationship  
 190 between speed and precision of transitions (excluding failed transitions) is non-linear as shown by locally weighted  
 191 smoothing fitted over subgroups. A high-resolution version of this figure can be accessed under  
 192 <https://figshare.com/s/4620a8ad6c5dad113bd1>



193 **Error rate**

194 An overview of the distribution of error rate across age groups and transition modes is depicted in  
195 Figure 3a. To capture a comprehensive picture of performance during the transition phase, we chose  
196 to split the precision measure into three distinct levels, namely, *fully correct transitions* representing  
197 transitions showing 100% correct tapping, *failed transitions* reflecting transitions with 100% of  
198 erroneous tapping, and *cumulative error rate* consisting of all remaining transitions not considered  
199 fully correct or failed.

200 ***Failed transitions [trials with 100% error rate].*** A logistic GLMM was used to predict failed  
201 transitions using group [OLDER, YOUNG], transition mode [IP, AP], and number of trials as  
202 independent variables (full results in Supplementary Table 6). With around 0.3%, the overall odds of  
203 completely failing a transition were low (intercept for group = young, nTRIALc = 0, transition mode  
204 = IP:  $\beta = -5.66 \pm 0.60$  (odds ratio  $0.003 \pm 0.002$ ), 95% CI [-6.83, -4.49],  $X^2 = -9.475$ ,  $p < .0001$ ). Based  
205 on the Type II Wald statistics, trial number significantly modulated the occurrence of failed  
206 transitions in a transition mode specific way and distinct for both age groups (GROUP  $\times$   
207 TRANSITION MODE  $\times$  nTRIALc,  $X^2(1) = 4.4$ ,  $p = .04$ , Figure 3c left). Compared to the young, the  
208 older showed a higher number of failed trials early on and subsequently a steep decline of about 5% in  
209 likelihood of failed transitions from early to late trials for transitions into AP (odds ratio =  $-0.51 \pm 0.17$ ,  
210 95% CI [0.27, 0.96],  $X^2 = -2.09$ ,  $p < .05$ ). Independent of group, transitions into AP were twice as  
211 likely to fail than transitions into IP (odds ratio =  $2.08 \pm 0.54$ , 95% CI [1.24, 3.46],  $X^2 = 2.80$ ,  $p < .01$ ,  
212 TRANSITION MODE Type II Wald  $X^2(1) = 34.99$ ,  $p < .0001$ ). Overall, with each additional trial, the  
213 odds of completely failing the transition tended to decline (odds ratio =  $0.70 \pm 0.14$ , 95% CI [0.47,  
214 1.04],  $X^2 = -1.78$ ,  $p = .08$ , nTRIALc Type II Wald  $X^2(1) = 9.86$ ,  $p < .01$ ) irrespective of group or  
215 transition mode.

216 ***Fully correct transitions [trials with 0% error].*** Similar to *failed transitions*, a logistic GLMM was  
217 fitted to predict fully correct transitions (full results in Supplementary Table 7). After removing failed  
218 transitions from the data, the overall odds for transitions to be fully correct were 4% (odds ratio =  
219 0.038 for intercept:  $\beta = -3.26 \pm 0.28$ , 95% CI [-3.80, -2.72],  $X^2 = -11.77$ ,  $p < .0001$ ). Following the  
220 Type II Wald statistics, the two main explanatory parameters were GROUP ( $X^2(1) = 15.43$ ,  $p < .0001$ )  
221 and TRANSITION MODE ( $X^2(1) = 24.4$ ,  $p < .0001$ ) and this was stable over number of trials.  
222 Remarkably, older participants were three times more likely to show completely correct trials (odds  
223 ratio =  $3.52 \pm 1.25$ , 95% CI [1.76, 7.045],  $X^2 = 3.6$ ,  $p < .001$ ), irrespective of transition mode. Compared  
224 to transitions into IP, switching into AP was half as likely to result in fully correct transitions (odds  
225 ratio =  $0.44 \pm 0.10$ , 95% CI [0.29, 0.69],  $X^2 = -3.63$ ,  $p < .001$ ) independent of group.

226 **Cumulative error rate** [ $0 < \text{error rate}/100 < 1$ ]. A beta GLMM (logit link) was fitted to predict  
227 cumulative error rate including the same parameters as described above (full results in Supplementary  
228 Table 8). After excluding fully correct and fully erroneous transitions [ $0 < \text{error rate}/100 < 1$ ],  
229 transitions between transition modes in either direction involved around 20% of erroneous tapping,  
230 i.e., cumulative error rate (intercept:  $\beta = 0.21 \pm 0.04$ , 95% CI [0.15 – 0.29],  $X^2 = -9.07$ ,  $p < .0001$ ).  
231 Based on the Type II Wald statistics, the two main parameters influencing cumulative error rate were  
232 number of trials (nTRIALc,  $X^2(1) = 6.692$ ,  $p < .01$ ) and TRANSITION MODE ( $X^2(1) = 4.91$ ,  $p < .05$ ).  
233 Investigating the parameter estimates revealed that cumulative error increased about 7% over the  
234 number of trials irrespective of group or transition mode ( $\beta = 1.07 \pm 0.02$ , 95% CI [1.02, 1.12],  $X^2 =$   
235 2.87,  $p < .01$ ). In comparison to transitions into IP, switching into AP tended to yield around 6%  
236 higher cumulative error rate irrespective of group ( $\beta = 1.06 \pm 0.03$ , 95% CI [0.99 – 1.13],  $X^2 = 1.78$ ,  $p$   
237 = .08).

### 238 **Transition Latency**

239 The transition latency was defined as the time delay between cue onset and valid response, i.e. the  
240 first occurrence of the correct transition mode indicated by the cue. Accordingly, *failed transitions*  
241 were excluded from the trials for the calculation of the transition latency. An overview of the  
242 distribution of transition latency across age groups and transition modes is depicted in Figure 3b. A  
243 GLMM (Gamma family with a log link) was fitted to predict transition latency with the same  
244 independent variables described for error rate (full results in Supplementary Table 9). Given the  
245 model's reference categories, the average transition latency was estimated around 569 ms (intercept  $\beta$   
246 =  $568.7 \pm 25.1$ , 95% CI [521.68, 620.03],  $X^2 = 143.98$ ,  $p < .0001$ ). Based on the Type II Wald  
247 statistics, GROUP ( $X^2(1) = 37.74$ ,  $p < .0001$ ), TRANSITION MODE ( $X^2(1) = 8.92$ ,  $p < .01$ ), and  
248 number of trials (nTRIALc,  $X^2(1) = 3.95$ ,  $p < .05$ ) were the parameters explaining most of the  
249 transition latency's variance. The parameter estimates revealed, that older switched around 38%  
250 slower between transition modes compared to the young ( $\beta = 1.38 \pm 0.08$ , 95% CI [1.22, 1.55],  $X^2 =$   
251 5.22,  $p < .0001$ ). Transitions into the AP pattern tended to be 7% slower than transitions into IP ( $\beta =$   
252  $1.07 \pm 0.04$ , 95% CI [0.99, 1.17],  $X^2 = 1.73$ ,  $p = 0.08$ ). Independent of group or transition mode,

253 transitions tended to become around 4% faster over time ( $n\text{TRIALc}$ ,  $\beta = 0.96 \pm 0.03$ , 95% CI [0.91,  
254 1.02],  $X^2 = -1.37$ ,  $p = .17$ ).

255 In summary, the behavioral results for error rate and transition latency show an expected  
256 slowing of the older participants but both age groups showed a decrease in transition latency across  
257 the experiment. However, the results show no general age-group effect on the precision of transition  
258 performance. While older seemed to have a slightly higher rate of failing transitions into the more  
259 difficult AP mode early on, they showed an overall higher rate of completely correct transitions  
260 throughout the experiment compared to the young. The overall cumulative error rate, i.e. the  
261 percentage of erroneous taps in the course of a single transition, was comparable between the two age  
262 groups, showing an increase in errors as a function of practice (i.e., number of trials) and a trend of  
263 higher errors for transitions into the more challenging AP mode. Additional support for comparable  
264 transition performance in both age groups comes from the results of the thumb reaction task (methods  
265 and results in Supplementary Note 1, Supplementary Table 10), which neither show an effect of group  
266 nor interactions with transition mode or time across the experiment.

267 Finally, estimating the association between transition latency and error rate revealed a non-  
268 linear association of these two parameters for both age groups and transition modes (Figure 3d). For  
269 both groups and transition modes, the speed-precision association may roughly be approximated with  
270 an inverted-U shaped curve, potentially reflecting several underlying mechanisms beyond a linear  
271 speed-accuracy trade-off. Therefore, we argue that reducing the dimensionality of these two  
272 performance characteristics into one single measure appears not feasible. For subsequent analysis  
273 steps, trials of *fully correct transitions* and *cumulative error rate* were recombined into *error rate*, i.e.  
274 *failed transitions* were not considered for further analysis.

## 275 **Task-related modulation of phase-based connectivity (ISPC)**

276 Phase-related connectivity (inter-site phase clustering, ISPC) between motor-cortical source signals  
277 was analyzed in N=20 young and N=22 older participants (see Methods for details about participant  
278 inclusion).

279 **Response-locked analysis of task and group related connectivity (ISPC) modulation.**

280 No significant clusters were found for the interaction of group and transition mode. Subsequently,  
281 separate contrast analyses were performed to evaluate the effects of age group [YOUNG - OLDER]  
282 and transition mode [IP – AP].

283 **Group Contrast [YOUNG – OLDER]**

284 A cluster showing a significant relative decrease of connectivity between the homologue M1 sources  
285 was evident for the mu to high beta frequency ranges (12-38Hz) starting from -160ms and lasting  
286 until 220ms relative to the transition (Figure 4a). This effect was driven by a strong reduction in  
287 connectivity in the young while the older showed an increased connectivity overall but also when  
288 divided into separate time × frequency sub-clusters, reflecting pre-/post transition time zones and  
289 conventional frequency sub-bands. The sub-clusters spanned the ranges pre-transition high beta (-160  
290 - 0ms, >25Hz), peri-transition low beta (-140 - 220ms, 15-25Hz), and post transition mu frequency  
291 range (>120ms, 12-15Hz, Figure 4a, clusters A-C).

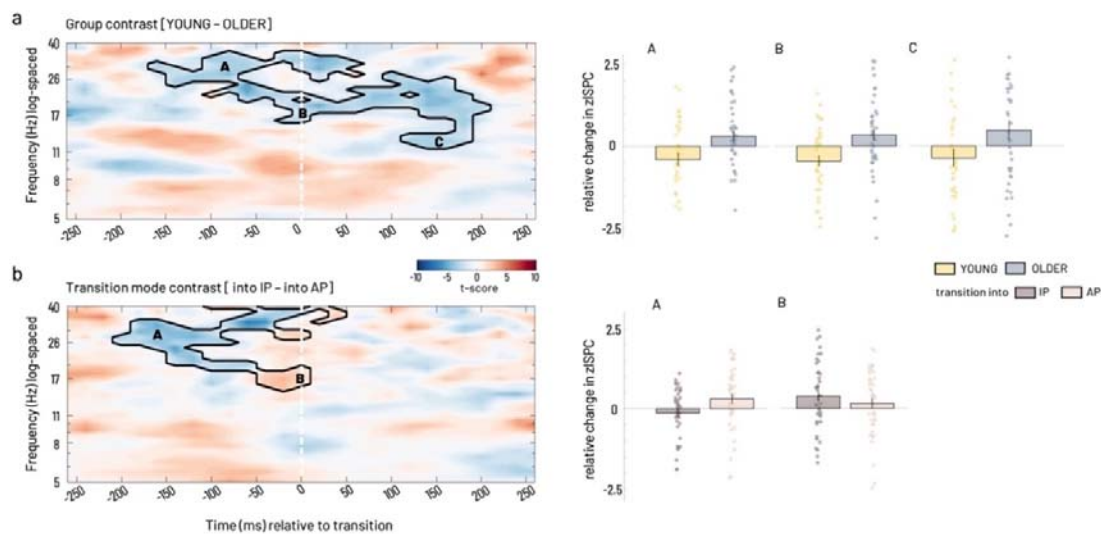

292 **Figure 4** Statistical results of ISPC between left and right M1 source a) for group contrast time-locked to the individual  
293 mean transition time. Cluster-corrected z maps for the test of GROUP contrast [YOUNG – OLDER, t-test against 0,  $p < .05$   
294 2-tailed]. Color coding in the time-frequency resolved zISPc plot indicates t-values. Dashed vertical lines at 0 ms on the  
295 time axis indicate the individual median latency, i.e. the time of transition. Bar plots present group averages of zISPc for  
296 respective cluster ranges, which were partly overlapping in time and frequency range for both, group and transition mode  
297 contrasts (black capital letters in the time-frequency plot correspond to black letters over bar plots), scatter plot depicts  
298 individual participants' data within group. b) Statistical results for transition mode contrast time-locked to the individual  
299 mean transition time. Cluster-corrected z maps for the test of TRANSITION MODE contrasts [into IP – into AP, t-test  
300 against 0,  $p < .05$  2-tailed]. Bar plots show transition mode averages for respective cluster ranges. A high-resolution version  
301 of this figure can be accessed under <https://figshare.com/s/11d01e6126cd7ba543de>  
302

### 303 **Transition mode Contrast [into IP – into AP]**

304 For the cortico-cortical connection, a single cluster was visible, extending mostly in the pre-transition  
305 time window in the mu to high beta range (Figure 4b). Between -200 and 0ms, a relative decrease in  
306 the full beta range (20-35 Hz) was evident (cluster A). This effect was driven by a decoupling before  
307 transitions into IP, while transitions into AP were rather associated with an increase in M1-M1  
308 connectivity before the actual transition was accomplished. Around the time of the transition, -50 –  
309 60ms, a relative increase in connectivity expanded over mu to beta range (cluster B), which was  
310 caused by an increased coupling for transitions into IP compared to transitions into AP.

311 Taken the results of both contrasts together, interhemispheric motor-cortical connectivity  
312 showed clear age group differences in its spectral features during transitions. Furthermore, a  
313 modulation by transition mode (into IP versus into AP) was also visible but we did not find evidence  
314 for altered connectivity in the older participants that was specific for transitions into one of the two  
315 transition modes but rather a general change in connectivity pattern in the older adults.

### 316 **Single-trial phase angle difference – behavior association**

317 Our next interest was to further investigate the association between interhemispheric interactions and  
318 behavior. Because inter-site phase clustering (ISPC) is calculated over trials, no inference can be  
319 made about the intra-individual variations of the inter-site phase relationship and its association with  
320 variations in behavior. Linking inter-site interactions and behavior on a trial-by-trial basis allows to  
321 interpret the signature of this association and draw conclusions about the behavioral relevance of the  
322 neural mechanisms. Therefore, frequency-specific phase angle differences between left and right M1  
323 were extracted for each trial at the respective trial-based time of transition for the low (15-22Hz) and  
324 high beta (25-30Hz) frequency ranges identified in the respective time × frequency clusters during the  
325 previous analysis step (Figure 4).

326 In order to explore the role of the endogenous GABA<sup>+</sup> concentration on this relationship, we  
327 dichotomized GABA<sup>+</sup> concentration into below and above within group median concentration. Two-  
328 way ANOVA results showed that the factor group was a major source of variance for the average

329 angle and that this was modulated by GABA+ level for both frequency ranges (**15-22Hz**: GROUP  
330  $X^2(2) = 99.22$ ,  $p < .0001$ , GABA+  $X^2(2) = 4.14$ ,  $p = .13$ , GROUP  $\times$  GABA+  $X^2(1) = 4.10$ ,  $p = .04$ ; **25-**  
331 **30Hz**: GROUP  $X^2(2) = 19.86$ ,  $p = 4.9e-05$ , GABA+  $X^2(2) = 8.75$ ,  $p = .013$ , GROUP  $\times$  GABA+  $X^2(1)$   
332  $= 9.99$ ,  $p = .0016$  (see Figure 5, additional results are given in Supplementary Note 3, Supplementary  
333 Table 11). Whereas, transition mode alone did not account for the variance in the data (**15-22Hz**:  
334 TRANSITION MODE  $X^2(2) = 0.57$ ,  $p = .8$ , GABA+  $X^2(2) = 4.14$ ,  $p = .13$ , TRANSITION MODE  $\times$   
335 GABA+  $X^2(1) = 5.38$ ,  $p = .02$ ; **25-30Hz**: TRANSITION MODE  $X^2(2) = 4.16$ ,  $p = .13$ , GABA+  $X^2(2)$   
336  $= 8.75$ ,  $p = .013$ , TRANSITION MODE  $\times$  GABA+  $X^2(1) = 2.85$ ,  $p = .09$ ). For both frequency ranges,  
337 circular-linear correlation revealed a significant association between phase-angle differences and  
338 quality of performance (i.e. error rate) following the transition. This association pattern was distinct  
339 for the two age groups in dependence of the relative (lower versus higher) GABA+ concentration.  
340 Specifically, when pooled over transition modes, phase angle differences were significantly associated  
341 with subsequent performance in the older adults in the low GABA+ subgroup. In the young, in  
342 contrast, a significant association was found for the high GABA+ subgroup (**15-22Hz**: OLDER<sub>high</sub>  
343 GABA+  $\rho = 0.03$ ,  $p_{FDR} = .5$ , YOUNG<sub>high</sub> GABA+  $\rho = 0.08$ ,  $p_{FDR} = 5.45e-10$ ; OLDER<sub>low</sub> GABA+  $\rho = 0.07$ ,  
344  $p_{FDR} = 5.45e-10$ , YOUNG<sub>low</sub> GABA+  $\rho = 0.02$ ,  $p_{FDR} = .7$ ; **25-30Hz**: OLDER<sub>high</sub> GABA+  $\rho = 0.03$ ,  $p_{FDR} =$   
345  $.9$ , YOUNG<sub>high</sub> GABA+  $\rho = 0.07$ ,  $p_{FDR} = .0005$ ; OLDER<sub>low</sub> GABA+  $\rho = 0.06$ ,  $p_{FDR} = .007$ , YOUNG<sub>low</sub>  
346 GABA+  $\rho = 0.04$ ,  $p_{FDR} = .2$ ). Plotting error rate as a function of phase angle differences shows a  
347 variation in the trend of this association along the range from  $-360^\circ$  to  $+360^\circ$  phase lag, i.e. explaining  
348 the overall small correlation coefficient (Figure 5c, d). Specifically, for both subgroups (older with  
349 lower GABA+, young with higher GABA+), a behavioral advantage for phase angle differences  
350 around  $0^\circ$  and higher subsequent error rate with phase angle differences of  $-180^\circ$  and  $180^\circ$  were found.



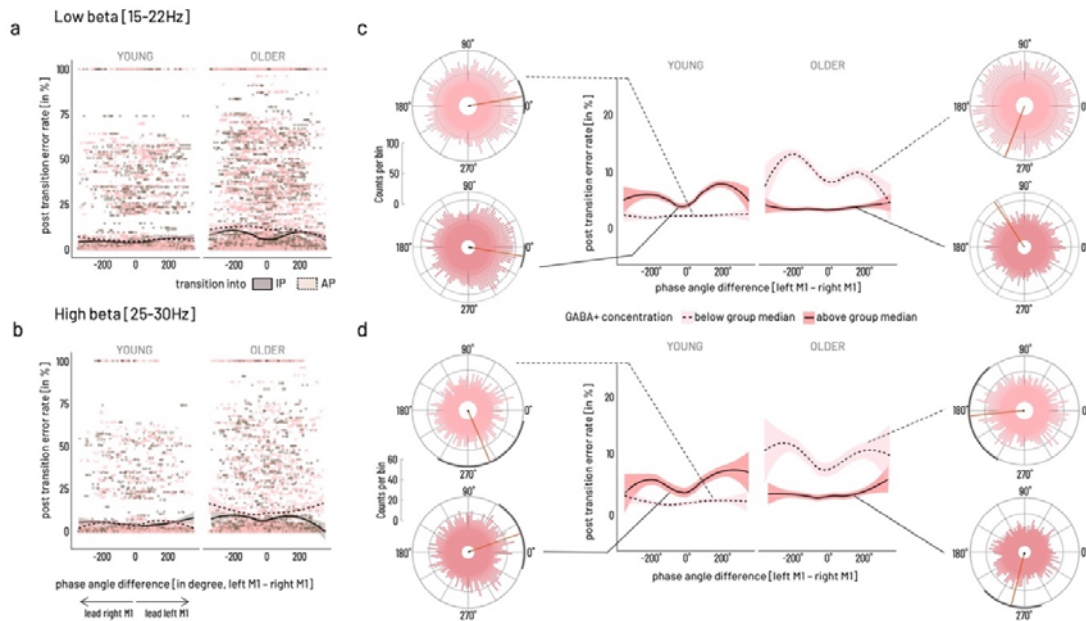

351  
 352 **Figure 5 Association between cortico-cortical phase angle differences at the time of transition and subsequent**  
 353 **performance error a) in the low beta [15-22Hz] range b) in the high beta range [25-30Hz].** Data points represent single  
 354 trial data for transitions into IP (brown) and into AP (light pink) mode, solid line indicates average phase angle difference –  
 355 behavior association during transitions into IP mode, dashed line indicates average phase angle difference – behavior  
 356 association for transitions into AP mode. c) Mean phase angle differences were significantly modulated by factors age group  
 357 and relatively higher versus lower GABA+ concentration when binarized into above (dark red shading, solid lines for  
 358 subsample mean) versus below group median (light pink shading, dashed lines for subsample mean) in the low and d) in the  
 359 high beta frequency band. Rose plots show histogram of binned phase angle differences with mean direction (red line) and  
 360 95% CI (black circumference) for significant non-uniformity of distribution. Phase angle differences for the low and high  
 361 beta band were significantly associated with subsequent performance error in the young with relatively higher and in the  
 362 older with relatively lower motor-cortical GABA+ concentration. In these subgroups, close to 0° phase lag was behaviorally  
 363 beneficial (lower errors), while close to 180° phase lag was associated with higher performance errors. A high-resolution  
 364 version of this figure can be accessed under <https://figshare.com/s/7b43133df22f84496168>

365 To validate the specificity of the effects in terms of task-context and topography, the same analysis  
 366 steps were run for two control conditions, namely the LM1-RM1 phase lag at a random time point  
 367 during baseline [start cue – 300ms], i.e. during between-trial pauses (Figure 1b), and for phase angle  
 368 differences for the OCC-L/RM1 connectivity at the time of transition. The analyses of the two control  
 369 conditions revealed a significant GROUP x GABA+ modulation of the mean direction of phase angle  
 370 differences between left and right motor cortical sources during the within-trial baseline [start cue -  
 371 300ms]. Furthermore, it showed a significant association between baseline phase lag and performance  
 372 in the subsequent trial. While this association broadly resembled the pattern during transition  
 373 described above, it was less specific for the within-age group GABA level in the low beta range  
 374 (descriptive and inferential statistics in Supplementary Tables 12-14, Supplementary Figure 3).

375 While we also found a significant GROUP x GABA<sup>+</sup> modulation of the mean direction of the phase  
376 angle differences between the occipital source and both motor cortical sources at the time of transition  
377 for both frequency ranges, the pattern of the mean direction clustering was clearly different from that  
378 of the interhemispheric motor-cortical interaction in that it was not involving the clustering around 0°  
379 and 180°. Finally, no association between occipital – primary motor phase lag and behavioral  
380 performance was found (OCC-LM1 and OCC-RM1 all  $p_{FDR} > .1$ , descriptive and inferential statistics in  
381 Supplementary Tables 15-18, Supplementary Figure 4).

382 In summary, single trial phase angle differences at the time of transition showed to be  
383 different between the age groups and this effect was influenced by level of motor-cortical GABA<sup>+</sup>  
384 concentration. While in the young, the association between phase angle difference at time of transition  
385 and subsequent performance error was stronger under the relatively higher GABA<sup>+</sup> concentration  
386 subgroup, the older showed a stronger association in the relatively lower GABA<sup>+</sup> concentration  
387 subgroup. In both cases, 0° phase lag represented a behaviorally more advantageous state whereas a  
388 180° phase lag was associated with more subsequent errors. This association was specific for the  
389 interaction between left and right primary motor sources and for the time of transition.

### 390 **Association between behavior and connectivity through GABA<sup>+</sup>**

391 In order to test the impact of baseline GABA<sup>+</sup> levels on the relationship between interhemispheric  
392 motor-cortical connectivity and behavior in addition to the effect of age on the associations among all  
393 three variables (see Methods for details, schematic model structure given in Figure 1a on the right),  
394 we employed a Bayesian moderated mediation analysis. For this purpose, we modelled the ISPC  
395 values extracted from the significant time × frequency sub-clusters of the response-locked analysis  
396 (independent variable), the median transition latency or error rate (dependent variable), the respective  
397 GABA<sup>+</sup> (mediator), and age (moderator) and estimated their associations in separate models for each  
398 of the individual connectivity pairs. Because all input variables were centered prior to modelling, it is  
399 necessary to keep in mind that conditional effects consequently need to be interpreted relative to the  
400 respective age group mean. As shown in the results below, for all significant models (see Figure 6a

401 for an overview), age was a relevant effect moderator of all model paths in the case of error rate and  
 402 transition latency (Figure 6b, c). Hence in the subsequent step, mediation results are shown  
 403 conditional on the moderator age, highlighting predominantly opposing trends in the two age groups  
 404 (regression coefficients for separate model paths given for all Bayesian moderated mediation models  
 405 in Supplementary Table 19).

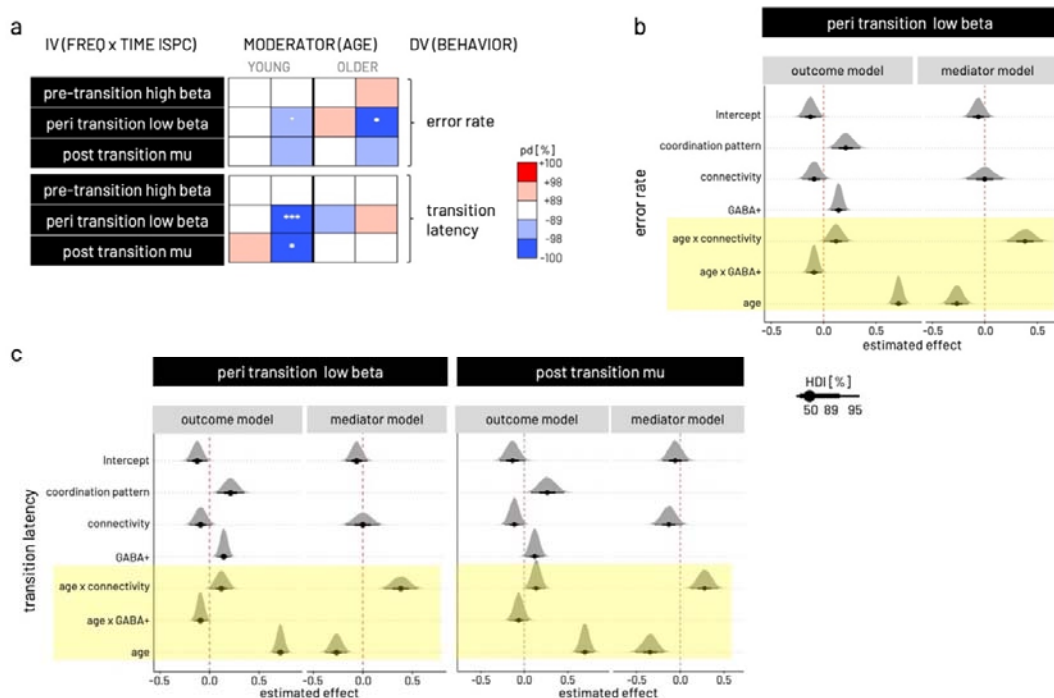

406  
 407 **Figure 6 Results of Bayesian moderated mediation models.** *a*) Overview over posterior directions (pd) for indirect  
 408 (mediation) effects on error rate (upper matrix) and transition latency (lower matrix) conditional on upper/lower quintiles of  
 409 moderator age (depicted as YOUNG and OLDER) for the models estimated with the independent variable (IV) based on the  
 410 three time  $\times$  frequency clusters derived in the response-locked ISPC analysis. Color coding of pd represents likelihood (in  
 411 %) and direction of effect, i.e. red shading for positive effects and blue shading for negative effects. A pd of 95, 97.5, 99.5,  
 412 and 99.95% corresponds to the frequentist 2-sided p-value at the thresholds 0.1, 0.05\*, 0.01\*\*, 0.001\*\*\* respectively. *b*)  
 413 Probability density plots for effects of parameters in the outcome and the mediator models input to the mediation analysis.  
 414 Depicted are the three models with significant mediation shown in *a*). Outcome model shown for error rate and peri  
 415 transition low beta ISPC. *c*) Outcome models shown for dependent variable transition latency and peri-transition low beta  
 416 ISPC (left) as well as post transition mu ISPC (right). For all three models shown in *b*) and *c*), the mediator model is related  
 417 to right M1 GABA+. Highlighted in yellow are the significant effects of moderator age in all three models indicated by the  
 418 posterior distributions of respective parameters falling with >99.5% on one side of the red dashed vertical line. Linewidth of  
 419 black horizontal bars indicate 50, 89, and 95% highest density interval [HDI] of the parameters' effect. A high-resolution  
 420 version of this figure can be accessed under <https://figshare.com/s/d6c5c42fa8395c4a779b>

421 **Connectivity significantly predicts behavior in a time and frequency specific manner and this**  
 422 **relationship is moderated by age.** The main results for the models estimating the association between  
 423 connectivity and behavior are graphically summarized in Figure 6a for cumulative error rate and  
 424 transition latency. Generally, models including right hemispheric GABA+ levels yielded stronger  
 425 evidence for mediation effects than those including left hemispheric GABA+ for both age groups.  
 426 Overall, the young group showed stronger evidence for mediation effects than the older.

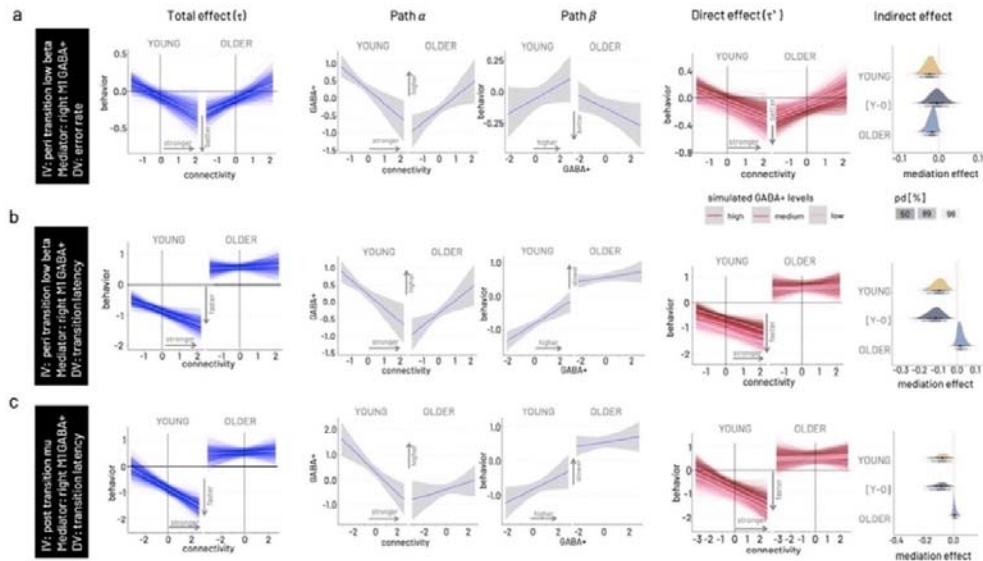

427

428 **Figure 7 Results of Bayesian moderated mediation models.** From left to right, total effect (path  $\tau$ ) conditional on moderator  
 429 age, association between connectivity and GABA+ (path  $\alpha$ ), association between GABA+ and transition latency (path  $\beta$ ),  
 430 simulation of the mediation effect on the connectivity – behavior association (direct effect, path  $\tau'$ ) for varying levels of  
 431 GABA+ (low – light pink, medium – red, high – dark red), and probability density plot for the mediation effect conditional  
 432 on age including the difference of young versus older [Y-O] mediation effects. In all three models, right hemispheric GABA+  
 433 concentration is modelled as mediator. **a) Model for peri-transition low beta connectivity – error rate association.** As  
 434 visible in the total effect, the young behaviorally benefit from stronger M1-M1 connectivity in the low beta range, while the  
 435 older show higher errors with stronger connectivity. The association between connectivity and GABA+ (path  $\alpha$ ) shows  
 436 opposing trends in the two age groups, a negative association in the young and a positive association in the older. The  
 437 association between GABA+ and transition latency (path  $\beta$ ) is positive in the young and negative in the older. Simulations  
 438 for the full moderated mediation model show that for the young the positive behavioral effect of stronger connectivity is  
 439 more pronounced in the presence of relatively lower GABA+, while for the older the negative effect of increased connectivity  
 440 is ameliorated in the presence of higher GABA+. Probability density plots of the mediation effect conditional on age for this  
 441 model show a negative indirect effect for both age groups, and no difference between the age groups. Grey shading of  
 442 probability of direction (pd) indicates limits of 50, 89, and 98% CI. **b) Model for peri-transition low beta connectivity –**  
 443 **transition latency association.** **c) Model for post-transition high mu connectivity – transition latency association.** A high-  
 444 resolution version of this figure can be accessed under <https://figshare.com/s/e7c918da53dbc9d5ea3f>

445 ***Stronger connectivity makes the young – but not the older – adults perform better.*** Simulating the  
446 total effect, i.e. the association between connectivity and behavior, conditional on moderator age  
447 reveals the opposing effects within the two groups (age group comparison depicted for one example  
448 model in Figure 7a). For all three time by frequency clusters, the young participants show strong  
449 evidence that relatively stronger connectivity is associated with better performance, i.e. lower (i.e.  
450 relatively faster) transition time (pd = 100%) and lower error rate (pd = 100%, except pre-transition  
451 beta). In contrast, within the older adults, relatively stronger connectivity is associated with a relative  
452 slowing in transition latency (pd 100%) but also with a trend for lower error rate (pd >89%, except  
453 post-transition mu).

454 ***Older adults benefit in precision from higher non-dominant GABA+ levels.*** For the association  
455 between connectivity in the peri-transition low beta band and error rate, both young (pd >95%) and  
456 older (pd >98%) show a negative indirect effect of right M1 GABA+ levels. This negative mediating  
457 effect has diverging consequences on behavior for the two age groups (Figure 7a). In the young, the  
458 association between relatively stronger coupling and better performance, i.e. lower error rate, was  
459 more pronounced in the presence of lower non-dominant GABA+ concentration. In the older, on the  
460 other hand, connectivity variations had a stronger impact on behavior, i.e. stronger coupling led to  
461 relatively higher error rates, in the presence of lower GABA+ concentration. In contrast, the  
462 association between stronger coupling and worse performance, i.e. higher error rate, was ameliorated  
463 in the presence of higher right M1 GABA+ concentration in the older.

464 ***Young adults are faster with higher connectivity in the presence of lower non-dominant GABA+.***  
465 Simulating the mediation effect conditional on the moderator age, revealed a negative indirect effect  
466 of right hemispheric GABA+ (pd >98-100%) on the association between connectivity on both  
467 behavioral outcomes, transition latency and, to a weaker extent (pd >89-95%), on error rate in the  
468 young. Specifically, in the presence of lower right M1 GABA+ levels, the negative association  
469 between peri-transition low beta and transition latency was steeper in the young, i.e. in the presence of  
470 low GABA+ levels, stronger connectivity was associated with generally faster transitions while this  
471 effect was less pronounced in the presence of high GABA+ levels (Figure 7b). This effect was  
472 comparable for connectivity in the high post-transition mu range and transition latency (Figure 7c).  
473 The mediation effect between connectivity and transition latency was absent in the older for all time  
474 by frequency clusters (Figure 7b, c). This absence of an indirect effect in the older can be explained  
475 by a weak association between the post-transition mu connectivity and GABA+ (path  $\alpha$ ) and in  
476 particular the absence of an association between right-hemispheric GABA+ and transition latency  
477 (path  $\beta$ ) in both models.

478 In summary, the multimodal data fusion analysis revealed four main findings with respect to  
479 the potential mediating role of baseline GABA+ on the association between connectivity and  
480 behavior. First, baseline GABA+ levels exert an indirect effect on the link between interhemispheric  
481 motor-cortical connectivity in the low beta and high mu frequency band, time-locked to the behavioral  
482 event, and behavior. Second, variations in non-dominant hemispheric (right M1) GABA+  
483 concentration was more likely to exert an indirect effect as compared to dominant hemispheric  
484 sensorimotor GABA+ concentration. Third, individual variations in baseline GABA+ were found to  
485 exert an indirect effect in the young for models with speed and error rate, whereas an indirect effect  
486 for the older was only found in the model with error rate. Fourth, although the mediating effect of  
487 individual variations in baseline GABA+ is of the same direction in both age groups, it has diverging  
488 implications for the connectivity – behavior association in young and older adults. Importantly, the  
489 latter two points underline the overall expected finding of age being a strong effect moderator for  
490 mostly all bimodal relationships investigated here.



## 491 **Discussion**

492 To flexibly adjust ongoing behavior and switch between different modes of action is an essential  
493 ability in the human behavioral repertoire. Unfortunately, this flexibility declines across cognitive  
494 domains with increasing age <sup>1</sup>. Using a multimodal approach to investigate the interplay between  
495 endogenous GABA and the brain's responsiveness during dynamic motor state transitions, a prototype  
496 of flexible behavior, we provide converging evidence to suggest age-related differences in the  
497 preferred state of endogenous GABA+ concentration to allow for interregional neural communication  
498 and benefit behavior. We are able to draw conclusions about the character of the neural and  
499 neurochemical findings with regard to age-related compensatory mechanisms versus deterioration.

### 500 **Interhemispheric interactions at time of transition predict subsequent** 501 **performance precision**

502 While the unimodal results highlighted the specific sensitivity of GABA+ concentration and phase-  
503 based interhemispheric motor-cortical connectivity to aging-related alterations, even in the absence of  
504 fundamental performance differences between the age groups, the evolving question became how the  
505 age-related changes may be expressed and reflect the underlying mechanisms of behavior.  
506 Consequently, we linked inter-site interactions in the beta frequency range, detected in the unimodal  
507 analysis of connectivity at the time of transition, and behavior on a trial-by-trial basis. This analysis  
508 revealed an age-group-specific modulation of the interhemispheric phase lag between primary motor  
509 sources at the time of transition in addition to its association with the subsequent performance error.  
510 In an exploratory analysis, we found a first indication that phase lag at the time of transition and its  
511 association with subsequent behavior varied in dependence on the GABAergic state. Specifically,  
512 while in the young adults, relatively lower (than median GABA in the young) motor-cortical GABA+  
513 concentration generally co-occurred with better performance irrespective of phase lag, relatively  
514 higher (than median GABA in the older) motor-cortical GABA+ concentration co-occurred with  
515 overall better performance in the older. In the respective less advantageous GABAergic state (i.e.,



516 relatively higher GABA+ in the young and relatively lower GABA+ in the older), 0° phase lag at the  
517 time of transition was followed by better performance, whereas a 180° phase lag was associated with  
518 more subsequent errors. These findings suggest a behavioral advantage through synchronization of  
519 interhemispheric primary motor sources with a phase lag of around 0°. Even though we may not rule  
520 out effects of volume conduction and source leakage on the inter-site phase relationship <sup>22</sup>, we were  
521 able to confirm our results' temporal and regional specificity by comparing the interhemispheric  
522 motor-cortical phase lag during the transition with that at baseline and with the occipital-motor  
523 interaction. Previous work has suggested zero-phase lag for long-distance connectivity in the beta  
524 frequency range between sensors covering left and right motor cortices during resting-state, as studied  
525 with magnetoencephalography <sup>23</sup>. Additional support for our findings' cogency comes from recent  
526 work that has proven the omnipresence of broadband zero-lag (i.e., 0° and 180° phase difference)  
527 functional connectivity, specifically for the homotopic brain regions based on intracranial recordings  
528 during varying vigilance levels in humans <sup>24</sup>. Although both studies have investigated spontaneous  
529 oscillations during resting-state, the authors speculated that functional connectivity around 0° phase  
530 lag might serve as a fundamental mechanism for the instantaneous integration of information from  
531 across brain regions allowing for predictive coding of expected events. Precisely, through long-  
532 distance synchronized oscillatory activity, the motor system might facilitate the anticipation of  
533 intrinsic or extrinsic cues allowing it to act with higher temporal precision. While our data support this  
534 hypothesis by showing a behavioral advantage of 0° phase lag at the time of transition, we also found  
535 an association between 0° phase lag during the within-trial baseline with performance of the  
536 subsequent trial, though less frequency-specific. During the within-trial baseline, the participants were  
537 required to remain attentive to the fixation cross and await the 'start cue'. Therefore, this observation  
538 suggests that the interhemispheric zero-lag synchronization might represent a more global state to  
539 potentially support the preparedness of the motor system. A mechanism to better anticipate the  
540 required behavioral action may have been specifically relevant in a less-well tuned system, i.e., less  
541 beneficial GABAergic state, and may represent a compensatory mechanism to uphold behavior.

## 542 **General age-gradient and hemispheric asymmetry of GABA+ concentration**

543 To further investigate the indirect effect of GABA+ concentration on the relationship between phase-  
544 based connectivity and behavior, we used a Bayesian moderated mediation analysis integrating all  
545 three modalities. This analysis step confirmed on the one hand a steep age gradient for all bimodal  
546 interactions, i.e., all paths within the model, rendering the mediation analysis conditional on the  
547 moderator age highly meaningful. On the other hand, it revealed a hemispheric asymmetry of the  
548 mediator GABA+. Specifically, modelling the right hemispheric GABA+ concentration yielded  
549 higher evidence for an indirect effect on the connectivity-behavior relationship as compared to the  
550 GABA+ concentration of the left hemisphere. Given the non-directedness of the connectivity measure  
551 and the bimanual nature of the behavioral outcomes used here, the only variable differentiating  
552 hemispheric laterality is the mediator. While we did not find a hemispheric difference in sensorimotor  
553 GABA+ concentration in either group in the unimodal analysis, the Bayesian model was sensitive to  
554 the actual variance. Previous MRS data from our own group support a hemispheric asymmetry in  
555 sensorimotor GABA+ concentration with lower concentration in the non-dominant hemisphere<sup>25,26</sup>.  
556 Electrophysiological data evidences an imbalance of phasic and tonic GABAergic inhibitory  
557 mechanisms within the motor system, also reflecting reduced fine-tuning of the non-dominant  
558 hemisphere across various age groups (e.g.<sup>27-29</sup>). Therefore, it is conceivable that the less well-tuned  
559 non-dominant hemisphere is more susceptible to excitation-inhibition variations and hence has a more  
560 pronounced effect on time-sensitive neural communication relevant for behavior, as suggested by our  
561 mediation results, irrespective of age. In addition to these two general findings, the mediation analysis  
562 delivered converging evidence for the two diverging states of beneficial GABA concentration in the  
563 two age groups as already suggested by the single-trial analysis of the phase angle differences.

## 564 **Relatively lower endogenous GABA+ reflects the optimally tuned young neural** 565 **system.**

566 We found an indirect effect of non-dominant GABA+ concentration on the connectivity –  
567 behavior association for both speed and precision in the young subgroup. In the presence of lower

568 GABA+ levels, relatively stronger peri-transition beta band and post-transition mu band coupling  
569 (i.e., less decoupling) was associated with better performance. This association weakened in the  
570 presence of higher GABA+ concentration in the young. Notably, the young showed overall higher  
571 GABA+ levels than the older for both motor cortex voxels. Hence, when interpreting the relative  
572 GABA+ concentration in the young, even lower levels are still comparably higher than the average  
573 seen in the older.

574 Computational modeling supports that extra-cellular GABA levels, most likely primarily  
575 detected with MRS<sup>30,31</sup>, are critically influencing the variability in cortical neural activity and thereby  
576 define adequate information processing and integration<sup>32</sup>. Previous in vitro and in vivo work from  
577 animal models suggests that low extracellular GABA+ concentration represents the fine-tuned  
578 physiological environment with the optimal inhibitory tone for efficient and timely precise up- and  
579 down-regulation of phasic synaptic inhibition (reviewed in<sup>33</sup>). In support of these findings,  
580 experimental elevation of GABA+ concentration has shown to cause disturbances of neural  
581 processing, perception, and behavior in young healthy volunteers. Hereof, pharmacologically  
582 increasing endogenous GABA beyond physiological levels has shown to lead to exaggerated  
583 amplitudes of early evoked responses in somatosensory cortical areas<sup>34</sup> and decreased amplitudes of  
584 medium-latency evoked responses in the visual cortex<sup>35</sup>. Previous findings of elevated GABA  
585 concentration affecting both phasic and tonic inhibitory signaling of pyramidal and inter-neuronal cell  
586 populations in superficial and deep cortical layers may serve as a potential explanation<sup>36-38</sup>. While it  
587 is worth noting that lowering GABAergic concentration below physiological levels also has shown to  
588 cause acute disturbance of spontaneous neural activity and perceptual processing in the primary visual  
589 cortex in young macaque monkeys<sup>39,40</sup>, additional evidence for the detrimental functional effects of  
590 elevated GABA levels is available for sensorimotor processing. Strengthened movement-related  
591 desynchronization in the beta-frequency range detected over the primary motor cortex has been  
592 specifically linked to pharmacologically increased GABAergic drive<sup>41</sup>. In this former work, local  
593 desynchronization in sensorimotor beta-band oscillations, instead of peri-movement gamma-band or  
594 post-movement beta-band synchronization, was critically susceptible to pharmacological

595 manipulation with benzodiazepines. In the present work, we found the indirect effect of GABA to be  
596 frequency-specific for response-locked modulation of long-distance synchronization in the mu and  
597 beta frequency range and its association with performance.

598 We therefore argue that the relatively lower endogenous GABA levels in the young reflects  
599 their neural system's preferred inhibitory state for effective neural communication, which assures the  
600 required responsiveness to modulate inhibition in the presence of dynamic task requirements.

601 **Higher GABA+ indicates neural system integrity and better functioning in the**  
602 **older adults.**

603 In older adults, evidence for an indirect effect of GABA+ was restricted to the association between  
604 peri-transition beta-band connectivity and error rate. While the indirect effect of baseline GABA+ was  
605 negative as in the young, the implications for the connectivity – behavior association were the  
606 opposite as compared to the young. The detrimental effect of higher beta band connectivity on  
607 performance error in the older was ameliorated in the presence of higher GABA+ levels. In contrast to  
608 the young, relatively higher endogenous GABA appeared to represent the behaviorally more  
609 beneficial state in the older adults. This finding is, at first sight, intriguing, and the question is why the  
610 older do not benefit from the relatively lower GABA+ levels in the same way the younger adults do?  
611 However, retaining relatively higher GABA+ levels, i.e. closer to the concentration found in the  
612 young, probably reflects less age-related decline and subsequently lower impact on time-sensitive  
613 modulation of neural communication. Along these lines, higher GABA+ concentration has been  
614 suggested to promote lower errors through optimal tuning of neural activity (reduced variability),  
615 promoting a better signal-to-noise ratio in the older. One effect of higher signal-to-noise is a more  
616 efficient perceptual filtering function from lower to higher level processing stages. A growing body of  
617 results from animal models (e.g. <sup>39,40</sup>), computational modeling <sup>32,42</sup>, as well as results from aging  
618 human volunteers (e.g. <sup>43</sup>) supports this hypothesis. From this perspective, the mediating effect of  
619 GABA levels on the association between peri-transition beta-band connectivity and performance  
620 precision but not performance speed in older adults, as seen here, appears conceivable.

621           The interhemispheric connectivity in the present study was modulated on a level of overall  
622 increased coupling in the older, whereas in the young a relative decoupling was observed throughout  
623 the motor-state transitions, which can be interpreted within the hypothesis of age-related  
624 dedifferentiation (e.g. <sup>44,45</sup>). Previous work has shown reduced endogenous GABA+ levels to be  
625 linked to decreased resting-state network segregation, i.e., increased connectivity, and lower  
626 sensorimotor performance in older adults <sup>12</sup>. Although controversial findings exist, an increased  
627 interregional coupling has frequently been observed across imaging methods in older populations  
628 during task-free <sup>46,47</sup> and task-related conditions <sup>48,49</sup>.

629           The question as to whether alterations in GABAergic transmission reflect the cause or the  
630 'cure' (i.e., compensation) for age-related neuronal functional decline reflected in behavioral  
631 performance deficits remains yet to be fully answered. In view of the limitations of the present work,  
632 it is necessary to point out that strictly speaking, a mediation implies the assumption of direct  
633 causality, which was not upheld in the present cross-sectional study. Considering the collision or  
634 confound of many other factors modifying age-related changes of the brain-behavior interaction  
635 neglected here, our findings highlight the importance to investigate the nature of the interactions as a  
636 function of age. Finally, our Bayesian moderated mediation analysis, though hypothesis-driven,  
637 followed an exploratory approach and we acknowledge the lack of a cross-validation. Nonetheless,  
638 based on the converging evidence from our multimodal analyses, we conclude by proposing the  
639 increased interhemispheric connectivity to represent a compensatory mechanism, which is brought  
640 about by rhythmic entrainment of neural populations in homotopic motor cortices. Through this  
641 increased (potentially zero-lag) synchronization, the motor system is in a better state to anticipate and  
642 dynamically control motor action. This mechanism appears to be readily available in the young and  
643 healthy brain but seems to be most relevant in the presence of a less optimal tuning of the inhibitory  
644 tone to uphold the required dynamics of behavioral action as seen here in the older.

## 645 **Materials and Methods**

### 646 **Ethics Statement**

647 The protocol and all procedures of this study complied with the ethical requirements in accordance  
648 with the Declaration of Helsinki in its revised version from 2008, as approved by the medical ethical  
649 committee of the KU Leuven (local protocol number S-58811, Belgian registration number  
650 B322201628182). All participants gave written informed consent to all of the study's experimental  
651 procedures and were reimbursed with 15 € per hour.

### 652 **Participants**

653 44 volunteers (older group N = 22, age range 62-82 years of age; young group N = 22, age range 21 –  
654 27 years of age) were recruited through local advertisements and were screened for in- and exclusion  
655 criteria. No statistical method was performed for an a priori sample size calculation; rather, we based  
656 reasoning for the selected sample size on numbers chosen in previous multimodal work (eg. <sup>12</sup>). One  
657 young participant dropped out after the MRI data acquisition for personal reasons unrelated to the  
658 study. MRI, EEG, and behavioral data were thus collected in 21 young (10 women) and 22 older (11  
659 women) participants. Due to technical problems, the EEG of one young participant had to be  
660 excluded, yielding different numbers of data sets included into the analysis for GABA, behavioral,  
661 and EEG analysis. All participants were right-handed, as evaluated with Edinburgh Handedness  
662 Inventory <sup>50</sup> (laterality quotient: older 92.50±0.20, young 85.00±0.15, median±95% CI). All  
663 participants were free from neurological impairments and musculoskeletal diseases affecting the  
664 unconstrained movement of the fingers, did not take neuroactive drugs, and had normal or corrected-  
665 to-normal vision as evaluated with an in-house standardized questionnaire.

666 **Magnetic Resonance Imaging (MRI) and Magnetic Resonance Spectroscopy**  
667 **(MRS) acquisition**

668 MRS data acquisition and reporting was done following the Magnetic Resonance Spectroscopy  
669 quality assessment tool (MRS-Q)<sup>51</sup>. A 3D high-resolution T1-weighted structural image (repetition  
670 time = 9.5 ms; echo time = 4.6 ms; voxel size = 0.98 x 0.98 x 1.2 mm<sup>3</sup>; field of view = 250 x 250 x  
671 222 mm<sup>3</sup>; 185 coronal slices) was acquired for each participant using a Philips Achieva 3.0T MRI  
672 system and a 32-channel head coil. The 30x30x30mm<sup>3</sup> MRS voxels were positioned based on the T1-  
673 weighted image. For the left and right sensorimotor voxels, this was centered above the hand knob  
674 area<sup>52</sup> and rotated in the coronal and sagittal planes to align with the cortical surface of the brain. The  
675 occipital voxel was medially centered over the interhemispheric fissure, with the inferior boundary of  
676 the voxel aligned in parallel to the Tentorium cerebelli to cover left and right occipital lobes  
677 symmetrically<sup>53</sup>.

678 Data were acquired using the Mescher–Garwood point resolved spectroscopy (MEGA-PRESS)  
679 sequence<sup>54</sup>, with parameters resembling those of previous work<sup>15–17</sup>; 14ms sinc-Gaussian editing  
680 pulses applied at an offset of 1.9 ppm in the ON experiment and 7.46 ppm in the OFF experiment, TR  
681 = 2000ms, TE = 68ms, 2000 Hz spectral bandwidth, MOIST water suppression, 320 averages, scan  
682 duration of 11 minutes, 12 seconds]. Sixteen water-unsuppressed averages were acquired from the  
683 same voxel. These scan parameters were identical for all three voxels.

684 MRS data were analyzed with the Gannet software 3.0 toolkit<sup>55</sup>. Individual frequency domain spectra  
685 were frequency- and phase-corrected using spectral registration<sup>56</sup> and filtered with a 3Hz exponential  
686 line broadening. Individual ON and OFF spectra were averaged and subtracted, yielding an edited  
687 difference spectrum, which was modelled at 3ppm with a single Gaussian peak and a 5-parameter  
688 Gaussian model. The unsuppressed water signal serving as the reference compound<sup>57</sup>, was fit with a  
689 Gaussian-Lorentzian model. The integrals of the modelled data were then used to quantify the  
690 uncorrected GABA levels. As discussed extensively, this method edits GABA as well as  
691 macromolecules at 3 ppm<sup>58,59</sup>, therefore GABA levels reported are referred to as GABA+ (i.e.,  
692 GABA+ macromolecules). To adjust GABA+ levels for heterogeneity in voxel tissue composition,



693 MRS voxels co-registered to the high-resolution anatomical image were segmented into three  
694 different tissue classes, namely gray matter (GM), white matter (WM), and cerebrospinal fluid (CSF),  
695 with SPM 12 (<http://www.fil.ion.ucl.ac.uk/spm/software/spm12/>). The resulting voxel compositions  
696 were used to extract tissue-corrected GABA+ following the assumptions that GABA+ levels are  
697 negligible in CSF and twice as high in GM relative to WM<sup>60</sup>, accounting for tissue-specific relaxation  
698 and water visibility values<sup>60</sup>. GABA+ levels were normalized to the average voxel composition  
699 within each age group after outlier removal<sup>60</sup>. Quality of the MRS data was assessed using the  
700 quantitative metrics GABA and the N-acetylaspartate signal-to-noise ratio (GABA SNR, NAA SNR),  
701 fit error of the GABA peak (GABA Fit Error), the drift (Drift) and the standard deviation of the water  
702 frequency offset (Frequency Offset), as well as linewidth, quantified as the full-width half-maximum  
703 of the modelled and N-acetylaspartate (NAA FWHM) signal.

## 704 **Behavioral Paradigm**

705 The behavioral task involved two transition modes representing the two motor states, i.e. a mirror-  
706 symmetric synchronous tapping of homologue fingers (in-phase, IP, the more stable motor state) and  
707 a synchronous tapping of the index and middle finger of opposite hands (anti-phase, AP, the less  
708 stable motor state). Since the AP transition mode has been shown to represent the coordinatively more  
709 challenging pattern<sup>13,18,61</sup>, tapping frequency was individually adjusted to 80% of the frequency with  
710 which the AP pattern was comfortably performed without involuntary spontaneous transitions into the  
711 IP transition mode. This individual tapping frequency was auditory paced throughout the complete  
712 experiment. During the EEG session, the auditory pacing stimulus was provided through insert  
713 etymotic earphones with flat frequency response (Cortech Solutions, Wilmington, NC, USA).  
714 Tapping was performed on a custom-made keyboard with six input keys (1000Hz sampling rate).  
715 Visual target cues were presented on a standard 19" computer screen (refresh rate 60Hz) and indicated  
716 which movement pattern to perform. Visual and auditory stimuli of the behavioral paradigm were  
717 programmed in LabVIEW 2016 (National Instruments, Austin/TX, USA). One complete trial  
718 consisted of a start cue subsequently followed by a cue to either continue with the same transition

719 mode ('continuation') or transition into the respective other pattern ('switching' from IP to AP, or  
720 vice versa, Figure 1a). In this study, we focused on the switching transitions and thus the ratio of  
721 occurrence of continuation versus switching transitions was set to approximately 1:5 to yield enough  
722 trials for further analysis and keep participants from automatically switching. Trials were interleaved  
723 with pauses ('pause'), which were always of the same length (3000ms); the other events had a jittered  
724 inter-stimulus interval (5000-8000ms). In order to preserve attention at a high level throughout the  
725 experiment, an additional thumb reaction time task (tRT) was included, which could occur instead of  
726 any other event type with a chance of 5%. The instruction was to respond as fast as possible upon cue  
727 occurrence (a magenta circle on left or right side of fixation cross) indicating either the left or right  
728 thumb to press the respective key. The tRT task was always followed by a pause with a latency of  
729 1000ms to avoid interference with transition performance. In order to minimize eye movements,  
730 participants were instructed to fixate a small cross in the center of the screen, which was visible at all  
731 times, during and in-between all cue presentations. For the within-trial pauses ('pause'), the  
732 instruction was to further attend to the fixation cross with minimal movement of the fingers or other  
733 body parts because these phases served as baseline for the EEG data analysis. Stimulus-response  
734 mapping was acquired during a training session held one day prior to the experiment. In this training  
735 session, a general familiarization with the keyboard was followed by the standardized frequency  
736 adjustment procedure. Subsequently, the visual cues were introduced with a visual presentation after  
737 which on average  $44 \pm 21$  minutes (young:  $36 \pm 16$ min., older:  $51 \pm 23$ min.) of training were performed  
738 in the individual tapping frequency until the participants were able to successfully perform one block  
739 of 14 trials. In the main experiment, the individual tapping frequency was re-adjusted and the  
740 participants performed in total 12 blocks of on average 14 trials each. Each block had a duration of  
741 approximately 4 minutes. Participants were given short breaks of individual length between each  
742 block in order to rest the eyes and make small movements.

## 743 **EEG recording and pre-processing**

744 Continuous EEG was recorded from 127 cephalic active surface electrodes (actiCAP, BrainProducts  
745 GmbH, Gilching/Germany) arranged according to the 10-10 system and referenced to the FCz  
746 electrode (implicit reference). Scalp-electrode impedance was kept below 20k $\Omega$ . Data were acquired  
747 with a sampling rate of 1kHz (BrainVision Recorder, version 1.21.0004, BrainProducts GmbH,  
748 Gilching/Germany).

749 Electrooculogram (EOG) was recorded using bipolar channels. For the EOG, silver/silver-chloride  
750 cup electrodes were placed on the left and right zygomatic processes (horizontal EOG) and on the left  
751 supraorbital process as well as on the sphenoid bone below the eye (vertical EOG).

752 All EEG data (pre-) processing and analyses were performed using functions from the  
753 EEGLAB toolbox version 2019.0<sup>62</sup>, the Fieldtrip toolbox version 20190419<sup>63</sup>, and customised  
754 Matlab functions (Matlab 2018b, MathWorks, Natick, MA, USA).

755 Off-line, data from EEG channels were high-pass filtered with a 1Hz cut-off to remove  
756 baseline drift and down-sampled to 250Hz. Line noise at 50 and 100Hz was removed based on a  
757 frequency-domain (multi-taper) regression with the ‘pop\_cleanline’ function of EEGLAB.  
758 Subsequently, continuous data were segmented into epochs of 5 seconds length,  $\pm 2.5$  seconds around  
759 the “start” (baseline) and the “transition” (time of interest) events in order to limit the effect of edge  
760 artifacts (Figure 1b).

761 Thereafter, a rigorous artefact removal pipeline was employed to minimize the effect of high  
762 muscle-related artefact while ensuring sufficient data for subsequent analyses. This procedure  
763 included a combination of semi-automatic and visual inspection steps. First, bad channels were  
764 identified and removed (EEGLAB trimOutlier plugin with 2 $\mu$ V as lower and 100 $\mu$ V as higher cut-off  
765 for identification of bad channels). Then canonical correlation analysis (implemented in the EEGLAB  
766 AAR plugin)<sup>64</sup> was used to identify and remove excessive EMG activity present in the data due to the  
767 motor task (288 seconds window length and shift between correlative analysis windows, 10<sup>6</sup>  
768 eigenratio, 15Hz, ratio of 10, based on the welch algorithm). Thereafter, independent component  
769 analysis (runica/Infomax algorithm as implemented in EEGLAB) and SASICA was used as a semi-

770 automatic procedure to inform removal of eye-movement -related and residual muscle artefacts <sup>65</sup>. For  
771 the identification of ICs representing relevant artifacts, MARA, FASTER, and ADJUST algorithms  
772 were used, and components were rejected if they contributed  $\geq 4\%$  of the total data variance. Epochs  
773 with remaining muscle artefacts were removed based on trial-by-trial visual inspection. On average 50  
774 trials per condition/participant went into further analysis. As a final step, available EEG channels  
775 were re-referenced to a common average reference.

## 776 **Localization of neuronal sources**

777 For the forward solution, an individual head model was created for each participant based on the same  
778 high-resolution structural MR image as used for the MRS analysis and 3D locations of the electrodes,  
779 registered with an optical infrared-camera based (NDI, Ontario, Canada) neuronavigation system  
780 (xensor™, ANT Neuro, Enschede, Netherlands). For the individual geometrical description of the  
781 head (mesh), the anatomical image was segmented into 12 tissue classes (skin, eyes, muscle, fat,  
782 spongy bone, compact bone, cortical gray matter, cerebellar gray matter, cortical white matter,  
783 cerebellar white matter, cerebrospinal fluid and brain stem), based on the MIMA model <sup>66</sup> using  
784 SPM12 (<http://www.fil.ion.ucl.ac.uk/spm/software/spm12/>) as described previously <sup>67-69</sup>. The EEG  
785 electrode positions were rigidly co-registered to the individual head surface (skin contour) by  
786 projecting the electrode coordinates in the native space through a rigid-body transformation, based on:  
787 (i) the estimation of anatomical landmarks (nasion, left/right peri-auricular points), (ii) the alignment  
788 of the electrode positions on the head surface through Iterative-Closest Point registration, and (iii) the  
789 projection of the electrodes onto the surface choosing the smallest Euclidean distance <sup>70</sup>. Conductivity  
790 values for each tissue class were grounded on previous findings <sup>71,72</sup>. Dipole sources were constrained  
791 by a regularly spaced 6mm three-dimensional grid spanning both the cortical/subcortical and the  
792 cerebellar gray matter. The volume conductor model was constructed based on a whole-head finite  
793 element model <sup>73</sup> using the SimBio toolbox (<https://www.mrt.uni-jena.de/simbio>) implemented in  
794 FieldTrip. In order to solve the inverse problem of describing the source activity, we made use of

795 exact low-resolution brain electromagnetic tomography (eLoreta) algorithm <sup>74</sup>, using a regularization  
796 factor  $\lambda = .05$ .

797 Source space time series were reconstructed using the precomputed filter for three regions of interest,  
798 the left and right primary motor cortex and the occipital cortex. Coordinates for these regions of  
799 interest were extracted from the group (OLDER vs. YOUNG) averages of the individual centroid  
800 coordinates of the MRS voxels in MNI space and transformed into native space. We used a sphere  
801 with a 6mm radius around the coordinates as a search grid to retrieve the gray matter grid voxel with  
802 the shortest distance to the coordinates of interest. Subsequently, singular value decomposition was  
803 used to reduce the dimensionality of the source activity time series in the target voxel from the x-, y-  
804 and z-components of the equivalent current dipole source to the projection that carried the maximal  
805 signal variance, i.e. the largest (temporal) eigenvector.

## 806 **Cortico-cortical connectivity**

807 In order to study the connectivity between cortical sources as a function of time, wavelet-based inter-  
808 site phase clustering, ISPC <sup>75</sup> was used. This phase-based connectivity measure depends on the  
809 distribution of the phase angle differences of two signals in polar space. The underlying assumption is  
810 that two neural sources are functionally coupled when their oscillations show temporal  
811 synchronization evidenced by angular differences. ISPC is a non-directional measure and has been  
812 shown to be less sensitive to time lags, non-stationarity of frequencies, and varying levels of noise <sup>76</sup>.

813 In order to extract the phase angles, spectral decomposition was computed by convolving the  
814 ROI source signal with a set of complex Morlet wavelets, defined as complex sine waves tapered by a  
815 Gaussian <sup>77</sup>. The frequencies of the wavelets were chosen from 2 Hz to 40 Hz in 50 logarithmically  
816 spaced steps in order to retrieve the full theta to beta frequency range. The full-width half-maximum  
817 (FWHM) ranged from 400 to 104ms with increasing wavelet peak frequency, corresponding to a  
818 spectral FWHM varying between 1.5 Hz and 12 Hz <sup>78</sup>. Subsequently, ISPC was computed for 35  
819 frequency steps from 5:40 Hz.

820 The phase angle differences were computed between ROI source signals over time and averaged over  
821 transition modes <sup>75,79</sup> on the down-sampled data (50Hz) following

822 Eq.1 
$$ISPC_f = \left| n^{-1} \sum_{t=1}^n e^{i(\phi_{xt} - \phi_{yt})} \right|$$

823 where  $n$  is the number of time points, and  $\phi_x$  and  $\phi_y$  are phase angles from signals  $x$  and  $y$  at  
824 frequency  $f$ . Temporal modulation of ISPC change was evaluated in the time of interest (0 to +2000  
825 post-cue, Figure 1b) relative to the baseline period (-500 to -200ms) computed by subtracting the  
826 baseline ISPC values from the ISPC values in the time of interest.

827

828 Additionally, instantaneous power was calculated by squaring the complex convolution results. Power  
829 spectra were normalized by converting the values to dB change relative to the fused within-trial  
830 baseline period, which was generated by averaging the time window between -500 and -200ms before  
831 the cue over all start trials <sup>80</sup>.

## 832 **Statistical analysis**

833 The statistical analysis involved in a first step the analysis of the individual outcome modalities  
834 (MRS, behavior, and EEG) and in a second step the joined analysis of all three outcome modalities.

835 Generally, for all generalized linear mixed effects models (GLMM) described hereafter, the goodness  
836 of fit was visually inspected based on the distribution of residuals. Models were fitted with a random  
837 intercept on subject level after validating that this improved model fit compared to the fixed effects  
838 model. Model comparison was performed based on Akaike Information Criterion (AIC) and Bayesian  
839 Information Criterion (BIC). Parameter estimates for fixed effects and their interactions as well as  
840 95% Confidence Intervals (CIs) and p-values were computed using Wald approximation. Parameter  
841 estimates for logistic models are reported as logits, i.e. log odds, as well as odds ratios. In the case of  
842 the beta model with logit link, parameter estimates are reported as proportions and change in rate of  
843 proportion. Standardized parameters were obtained by fitting the model on a standardized version of  
844 the dataset. Relevant interactions were followed up with contrasts for model estimated marginal  
845 means of parameter levels and reported as standardized differences ( $\Delta EMM \pm$  standard error, 95% CI,

846 z-value, p-value adjusted for multiple comparisons with Holm's method). Effect sizes are reported for  
847 the models' total explanatory power with conditional  $R^2$  and for the fixed effects part alone with  
848 marginal  $R^2$ <sup>81 82</sup>. Forest plots are used to give an overview over the models' parameter estimates  
849 with CI, direction, and significance of their effects. Distribution and boxplots are used to represent  
850 summary statistics of group data. Computed variables for boxplots: lower/upper whiskers represent  
851 smallest/largest observation greater than or equal to lower hinge  $\pm 1.5 * \text{inter-quartile range (IQR)}$ ,  
852 lower/upper hinge reflects 25%/75% quantile, lower edge of notch = median  $- 1.58 * \text{IQR} / \text{sqrt}(n)$ ,  
853 middle of notch reflects group median.

#### 854 **Analysis of the MRS data**

855 GABA+ data were best estimated with a GLMM showing optimized fit modelling a gamma  
856 distribution and identity link function. Factors GROUP, VOXEL, and their interaction were modelled  
857 as fixed effects based on the study design variables. Random intercepts were fit on subject level. In  
858 order to identify the influence of the quality metrics and raw grey matter fraction (GM fraction) and  
859 their potential interaction with group or voxel, a stepwise backwards selection approach was taken  
860 starting from a beyond optimal model with all covariates and their interaction with voxel or group.  
861 Based on the significance of parameters in the analysis of deviance (Type II Wald statistics), non-  
862 significant interactions were eliminated.

#### 863 **Analysis of the behavioral data**

864 **Error rate.** To analyze the occurrence of errors within the behavioral task, we chose to code and  
865 analyze three different aspects of the error information in the data in order to account for the skewed  
866 distribution of percentage data and the inherently zero-inflated data.

867 First, the data was transformed in a binary outcome coding *failed transitions*, i.e. trials with an error  
868 rate of 100%. Binarization of the data was achieved by coding fully erroneous trials as "1" and all  
869 other trials as "0". This step was done based on the full set of available trials. A GLMM was used as a  
870 hurdle model and fit to the data with a Poisson distribution and logit link.



871 Second, after removing the fully erroneous trials, the remaining data was transformed in a binary  
872 outcome coding *fully correct transitions*, i.e. an error rate of 0 coded as “1”, versus erroneous trials,  
873 i.e. and error rate >0 coded as “0”. As described in the first step, a GLMM was used as a hurdle model  
874 and fit to the data with a Poisson distribution and logit link.

875 Third, *cumulative error rate* in the trials not considered fully correct or fully erroneous, i.e. non-zero-  
876 inflated trials, were transformed into the range of the beta distribution [ $0 < \text{error rate}/100 < 1$ ] and  
877 modelled as such using a GLMM with a “logit” link function. For all three error-rate-based outcomes,  
878 factors GROUP (old, young), TRANSITION MODE (into IP, intoAP), and covariate nTRIALc (trial  
879 number, centered) were entered into the model as fixed effects including all possible interactions. To  
880 account for intra-individual variability, random intercepts were modelled on subject level.

881 **Transition Latency.** Transition latency did not follow a normal distribution and was therefore  
882 analyzed with a GLMM showing optimized fit assuming a gamma distribution and log link function.  
883 In analogy to the models for error rate, factors GROUP (old, young), TRANSITION MODE (into IP,  
884 into AP), and covariate nTRIALc (trial number, centered) were modeled as fixed effects including all  
885 possible interactions. Random intercepts were modelled on subject level.

886 The association between transition latency and error rate (excluding failed transitions) was estimated  
887 for transition modes within age groups separately using a non-linear locally-weighted smoothing  
888 fitted over subgroups.

889 The additional thumb reaction time task (tRT) was analyzed separately; methods and results are  
890 reported Supplementary Note 1 and Supplementary Table 10.

### 891 **Analysis of the EEG data**

892 EEG data were analyzed with the main focus on phase-related connectivity (ISPC) between motor-  
893 cortical source and the signal from intrinsic hand muscles. The statistical analysis of the task-related  
894 modulation of the spectral signature followed the pipeline described for ISPC below. Additional  
895 methods and results are presented in Supplementary Note 2 and Supplementary Figure 1 to allow the  
896 interpretation of the association/independence of ISPC and spectral power changes.

897 The effect of transition mode and age group on the frequency-band specific modulation of  
898 connectivity (inter-site phase clustering, ISPC) was analyzed in three steps. First, ISPC change from  
899 baseline was analyzed within subject using a cluster corrected permutation (1000 permutations, 2-  
900 tailed t-test,  $p < .05$ ) to extract the effect size of change from baseline irrespective of transition mode.  
901 This step was used to extract the z-transformed ISPC changes (zISPC) per condition within subject. In  
902 this and the subsequent steps, clusters were corrected for multiple comparisons and considered  
903 significant if they contained more time  $\times$  frequency data points than expected under the null  
904 hypothesis at  $p < .05$ <sup>83</sup>.

905 Second, group-level cluster-based permutation analysis (1000 permutations, 2-tailed t-test,  $p < .05$ ) of  
906 change in baseline-subtracted zISPC pooled over transition modes (stimulus-locked analysis) was  
907 used to confirm the relevance of connectivity modulation within the selected time and frequency  
908 windows. The results of this second step containing the stimulus-locked analysis of connectivity  
909 modulation are presented in Supplementary Figure 2.

910 Third, in order to test the effect transition mode and its modulation by age group, differences of the z  
911 matrices were calculated for the transition mode contrast (IP – AP) for the age groups separately and  
912 subsequently subtracted from each other ([IP-AP]YOUNG – [IP-AP]OLDER). A two-sided t-test  
913 ( $p < .05$ ) was then run with permuting the age group allocation (1000 permutations).

914 The third step was performed relative to the response, i.e.  $\pm 260$ ms around the individual median  
915 transition latency specific for IP and AP transitions, respectively (response-locked analysis). As task-  
916 related connectivity was not modulated by an interaction of condition and age group; therefore, both  
917 factors were tested subsequently in separate t-tests permuting the respective factor level allocation  
918 (1000 permutations,  $p < .05$ ).

### 919 **Analysis of the association between phase-angle differences and behavior**

920 Frequency-specific phase angle differences between left and right M1 were extracted for each trial at  
921 the respective trial-based time of transition for the low (15-22Hz) and high beta (25-30Hz) frequency  
922 ranges identified in the respective time  $\times$  frequency clusters during the previous analysis step. To rule  
923 out randomness of phase angle differences, non-uniformity of their distribution was tested using the

924 Rayleigh test. A two-way ANOVA for circular data was used to test between-group differences and  
925 their interaction with GABA+ concentration. For this analysis step, artificial dichotomization of  
926 GABA+ concentration (into below and above within group median concentration) was necessary<sup>84</sup>.  
927 Phase angle differences were then correlated with the single trial error rate following the transition  
928 using circular-linear correlation. To validate the specificity of the effects in terms of task-context and  
929 topography, the same analyses steps were run for two control conditions, namely the LM1-RM1 phase  
930 lag at a random time point during baseline [start cue – 300ms], i.e. during between trial pauses (Figure  
931 1b), and for phase angle differences for the OCC-L/RM1 connectivity at the time of transition. All  
932 circular statistics and visual representations were performed with CircStat<sup>85</sup> and CircHist  
933 (<https://github.com/zifredder/CircHist>) Toolboxes implemented for Matlab 2018b and R package  
934 circular (version 0.4-93)<sup>86</sup>. All results are reported with FDR-corrected<sup>87</sup> p-values ( $p_{FDR}$ ) to account  
935 for multiple comparisons across all subgroups.

### 936 **Analysis of the association between connectivity and behavior through GABA+**

937 The next goal was to get further insight into the relationship between EEG-derived connectivity  
938 metrics and behavior and the potential impact of endogenous GABA+ levels on this relationship in the  
939 presence of the effect of age. Therefore, we made use of Bayesian moderated mediation analysis  
940 modelling GABA+ as mediator and age as moderator variable and their impact on the relationship  
941 between cortico-cortical and cortico-spinal connectivity and behavior, i.e. *transition latency* and *error*  
942 *rate* (including *cumulative error rate* and *fully correct transitions* but excluding *failed transitions*).  
943 This approach allowed us to further dissect the connectivity – behavior relationship given the  
944 individual variations of background GABA+ levels in the context of assumed aging-related changes  
945 of the associations between all variables. The Bayesian approach permits accounting for the non-  
946 gaussian data structure of the present sample and its size<sup>88</sup>. Conceptually, a moderated mediation  
947 model is built based on two regression models, in this case two generalized linear models, one that  
948 estimates the effect of the independent variables and relevant covariates (here the moderator) on the  
949 dependent variable (the outcome model, Eq. 2), and the second, which estimates the effect of the  
950 independent variable and relevant covariates on the mediator (the mediator model, Eq. 3):

951 Eq. 2  $Y = i_1 + c_1X + c_2W + c_3XW + b_1M + b_2MW + e_1$

952 Eq. 3  $M = i_2 + a_1X + a_2W + a_3XW + e_2.$

953 In these models,  $i_1$  and  $i_2$  are intercepts,  $Y$  is the dependent variable,  $X$  is the independent variable,  $M$   
954 is the mediator, and  $W$  is the moderator  $W$  interacting with each variable. In the outcome model (Eq.  
955 2),  $c_1$  is the coefficient relating the independent variable and the dependent variable,  $b_1$  is the  
956 coefficient relating the moderator to the dependent variable,  $c_2$  identifies the coefficient relating  
957 moderator and independent variable, the coefficients for the interactions with the moderator are  $c_3$  and  
958  $b_2$ . In the mediator model (E. 3.),  $a_1$  is the coefficient relating the independent variable with the  
959 mediator,  $a_2$  is the coefficient relating the moderator with the mediator, and  $a_3$  is the coefficient for  
960 the interaction of the independent variable and the moderator. The residuals are identified by  $e_1$  and  
961  $e_2$ . These two models are combined within one multilevel model and estimated simultaneously for the  
962 moderated mediation analysis.

963 Here, a series of individual moderated mediation models was run for left M1- right M1 connectivity,  
964 using the respective zISPC pooled over the significant time  $\times$  frequency clusters in addition to the  
965 GABA+ values of the corresponding voxel (e.g. model 1: predictor variable left M1 – right M1  
966 zISPC, outcome variable transition latency, mediator variable left M1 GABA+, model 2: predictor  
967 variable left M1 – right M1 zISPC, outcome variable transition latency, mediator variable right M1  
968 GABA+). Coordination pattern (IP vs. AP) was included in the outcome model to account for its  
969 significant impact on both behavior and connectivity. Within each moderated mediation model,  
970 different associations (model paths) moderated by age were jointly estimated: i) the association  
971 between independent and dependent variable in the absence of mediation (path  $\tau$ , total effect); ii) the  
972 association between independent variable and mediator (path  $\alpha$ ); iii) the association between mediator  
973 and dependent variable (path  $\beta$ ); iii) the mediation effect ( $\alpha*\beta$ , indirect effect); and iv) the association  
974 between independent and dependent variable after adjusting for mediation (path  $\tau'$ , direct effect)<sup>88</sup>. A  
975 schematic of the moderated mediation model framework is given in the inlay in Figure 1a on the top  
976 right.

977 All input variables were centered prior to fitting the GLMMs for outcome and mediator models using  
978 an exgaussian distribution, identity link functions (for mu, sigma, and beta), and uniform priors.  
979 Posterior distributions for multivariate models were obtained using Hamiltonian Monte-Carlo  
980 algorithm using Stan <sup>89</sup> implemented for R with brms <sup>90,91</sup> and rstanarm <sup>92</sup> packages. Four random  
981 walk chains each with 10.000 iterations discarding the first 1000 iterations (burn-in) were used for  
982 inference. Model convergence was examined using pareto-k diagnostics, approximate leave-one-out  
983 criterium (LOO), R-hat, and effective sample size (bulk-/tail-ESS); Bayesian R<sup>2</sup> served as indicator  
984 for quality of model fit. Median estimates and non-equi-tailed 89% credible intervals, i.e. Highest  
985 Density Intervals (89% HDI), are used to describe centrality and quantify uncertainties of the  
986 regression coefficients for the individual model paths accounting for their assumed skewness. In order  
987 to disentangle the influence of the mediator depending on variations of the moderator, a conditional  
988 process analysis was employed. Specifically, conditional estimates were simulated based on posterior  
989 draws for lowest versus highest sample quintiles of mediator and moderator. To allow for inferences  
990 about the relevance of the effects, probability of direction is reported (pd) for posterior probabilities,  
991 which can be interpreted as the probability (expressed in percentage) that a parameter (described by  
992 its posterior distribution) is strictly positive or negative. The pd can take values between 50 (one half  
993 on each side) and 100 (fully on either side) and is approximated to a frequentist 2-sided p-value with  
994 the formula  $p\text{-value} = 2*(1-pd/100)^{93,94}$ . Hence, a pd of 95, 97.5, 99.5, and 99.95% corresponds to p-  
995 value at the thresholds 0.1, 0.05, 0.01, 0.001.

## 996 **Data availability**

997 General source data are not publicly available due to European legal restrictions compromising the  
998 research participants' privacy and consent. Source data to reproduce results given in figures 2-7 are  
999 provided under [<https://figshare.com/s/c2df37a0f7f68b9d208c>]. Code to reproduce the results is  
1000 available from the corresponding author [KFH].

## 1001 **Acknowledgments**

1002 We thank René Clerckx for software and technical support and Paul Meugens for technical support  
1003 and skillful building of the technical equipment, and all volunteers for their motivation to participate.

## 1004 **Funding disclosure**

1005 This work was supported by the Internal Research Fund KU Leuven (PDM/15/182) and the Research  
1006 Foundation Flanders (1509816N, G089818N, G0F7616N, I005018N), the Excellence of Science grant  
1007 (EOS, 30446199, MEMODYN), the KU Leuven Research Fund (C16/15/070), and Science  
1008 Foundation Ireland (18/IF/6272).

## 1009 **Competing Interests**

1010 The authors declare that no competing interests exist.

## 1011 **References**

- 1012 1. Steyvers, M., Hawkins, G. E., Karayanidis, F. & Brown, S. D. A large-scale analysis of task  
1013 switching practice effects across the lifespan. *Proceedings of the National Academy of Sciences*  
1014 **116**, 17735-17740 (2019).
- 1015 2. Rozycka, A. & Liguz-Leczna, M. The space where aging acts: focus on the GABAergic  
1016 synapse. *Aging Cell* **16**, 634-643 (2017).
- 1017 3. Buzsáki, G., Geisler, C., Henze, D. A. & Wang, X. J. Interneuron Diversity series: Circuit  
1018 complexity and axon wiring economy of cortical interneurons. *Trends Neurosci* **27**, 186-193  
1019 (2004).
- 1020 4. McBain, C. J. & Fisahn, A. Interneurons unbound. *Nat Rev Neurosci* **2**, 11-23 (2001).
- 1021 5. Cardin, J. A. Inhibitory interneurons regulate temporal precision and correlations in cortical  
1022 circuits. *Trends in neurosciences* **41**, 689-700 (2018).
- 1023 6. Fries, P. A mechanism for cognitive dynamics: neuronal communication through neuronal  
1024 coherence. *Trends in cognitive sciences* **9**, 474-480 (2005).
- 1025 7. Fries, P. Rhythms for cognition: communication through coherence. *Neuron* **88**, 220-235  
1026 (2015).
- 1027 8. Heise, K. F. et al. The aging motor system as a model for plastic changes of GABA-mediated  
1028 intracortical inhibition and their behavioral relevance. *J Neurosci* **33**, 9039-9049 (2013).
- 1029 9. Hermans, L. et al. Age-related alterations in the modulation of intracortical inhibition during  
1030 stopping of actions. *Aging (Albany NY)* **11**, 371-385 (2019).

- 1031 10. Spooner, R. K., Wiesman, A. I., Proskovec, A. L., Heinrichs-Graham, E. & Wilson, T. W.  
1032 Rhythmic Spontaneous Activity Mediates the Age-Related Decline in Somatosensory Function.  
1033 *Cereb Cortex* **29**, 680-688 (2019).
- 1034 11. Marengo, S. et al. Role of gamma-amino-butyric acid in the dorsal anterior cingulate in age-  
1035 associated changes in cognition. *Neuropsychopharmacology* **43**, 2285-2291 (2018).
- 1036 12. Cassidy, K. et al. Sensorimotor network segregation declines with age and is linked to GABA  
1037 and to sensorimotor performance. *Neuroimage* **186**, 234-244 (2019).
- 1038 13. Houweling, S., Beek, P. J. & Daffertshofer, A. Spectral changes of interhemispheric crosstalk  
1039 during movement instabilities. *Cereb Cortex* **20**, 2605-2613 (2010).
- 1040 14. Coxon, J. P. et al. Reduced basal ganglia function when elderly switch between coordinated  
1041 movement patterns. *Cereb Cortex* **20**, 2368-2379 (2010).
- 1042 15. Mikkelsen, M. et al. Big GABA: Edited MR spectroscopy at 24 research sites. *Neuroimage* **159**,  
1043 32-45 (2017).
- 1044 16. Hermans, L. et al. GABA levels and measures of intracortical and interhemispheric excitability  
1045 in healthy young and older adults: an MRS-TMS study. *Neurobiology of Aging* **65**, 168-177  
1046 (2018).
- 1047 17. Maes, C. et al. Age-related differences in GABA levels are driven by bulk tissue changes. *Hum*  
1048 *Brain Mapp* **39**, 3652-3662 (2018).
- 1049 18. Meyer-Lindenberg, A., Ziemann, U., Hajak, G., Cohen, L. & Berman, K. F. Transitions  
1050 between dynamical states of differing stability in the human brain. *Proc Natl Acad Sci U S A*  
1051 **99**, 10948-10953 (2002).
- 1052 19. Aramaki, Y., Haruno, M., Osu, R. & Sadato, N. Movement initiation-locked activity of the  
1053 anterior putamen predicts future movement instability in periodic bimanual movement. *J*  
1054 *Neurosci* **31**, 9819-9823 (2011).
- 1055 20. Banerjee, A., Tognoli, E., Kelso, J. A. & Jirsa, V. K. Spatiotemporal re-organization of large-  
1056 scale neural assemblies underlies bimanual coordination. *Neuroimage* **62**, 1582-1592 (2012).
- 1057 21. Heise, K. F., Monteiro, T. S., Leunissen, I., Mantini, D. & Swinnen, S. P. Distinct online and  
1058 offline effects of alpha and beta transcranial alternating current stimulation (tACS) on  
1059 continuous bimanual performance and task-set switching. *Sci Rep* **9**, 3144 (2019).
- 1060 22. Palva, J. M. et al. Ghost interactions in MEG/EEG source space: A note of caution on inter-  
1061 areal coupling measures. *Neuroimage* **173**, 632-643 (2018).
- 1062 23. Nikouline, V. V., Linkenkaer-Hansen, K., Huttunen, J. & Ilmoniemi, R. J. Interhemispheric  
1063 phase synchrony and amplitude correlation of spontaneous beta oscillations in human subjects:  
1064 a magnetoencephalographic study. *Neuroreport* **12**, 2487-2491 (2001).
- 1065 24. O'Reilly, C. & Elsabbagh, M. Intracranial recordings reveal ubiquitous in-phase and in-  
1066 antiphase functional connectivity between homotopic brain regions in humans. *J Neurosci Res*  
1067 **99**, 887-897 (2021).
- 1068 25. Cuypers, K. et al. Task-related measures of short-interval intracortical inhibition and GABA  
1069 levels in healthy young and older adults: A multimodal TMS-MRS study. *Neuroimage* **208**,  
1070 116470 (2019).
- 1071 26. Maes, C. et al. GABA levels are differentially associated with bimanual motor performance in  
1072 older as compared to young adults. *NeuroImage* 117871 (2021).
- 1073 27. Ilic, T. Subtle hemispheric asymmetry of motor cortical inhibitory tone. *Clinical*  
1074 *Neurophysiology* **115**, 330-340 (2004).
- 1075 28. Shin, H.-W., Sohn, Y. H. & Hallett, M. Hemispheric asymmetry of surround inhibition in the  
1076 human motor system. *Clinical Neurophysiology* **120**, 816-819 (2009).
- 1077 29. Vallence, A.-M., Smalley, E., Drummond, P. D. & Hammond, G. R. Long-interval intracortical  
1078 inhibition is asymmetric in young but not older adults. *Journal of Neurophysiology* **118**, 1581-  
1079 1590 (2017).
- 1080 30. Stagg, C. J. et al. Relationship between physiological measures of excitability and levels of  
1081 glutamate and GABA in the human motor cortex. *J Physiol* **589**, 5845-5855 (2011).
- 1082 31. Dyke, K. et al. Comparing GABA-dependent physiological measures of inhibition with proton  
1083 magnetic resonance spectroscopy measurement of GABA using ultra-high-field MRI.  
1084 *Neuroimage* **152**, 360-370 (2017).



- 1085 32. Hoshino, O., Kameno, R. & Watanabe, K. Reducing variability in motor cortex activity at a  
1086 resting state by extracellular GABA for reliable perceptual decision-making. *J Comput*  
1087 *Neurosci* **47**, 191-204 (2019).
- 1088 33. Farrant, M. & Nusser, Z. Variations on an inhibitory theme: phasic and tonic activation of  
1089 GABA(A) receptors. *Nat Rev Neurosci* **6**, 215-229 (2005).
- 1090 34. Restuccia, D. et al. Contribution of GABAergic cortical circuitry in shaping somatosensory  
1091 evoked scalp responses: specific changes after single-dose administration of tiagabine. *Clin*  
1092 *Neurophysiol* **113**, 656-671 (2002).
- 1093 35. Muthukumaraswamy, S. D. et al. Elevating endogenous GABA levels with GAT-1 blockade  
1094 modulates evoked but not induced responses in human visual cortex.  
1095 *Neuropsychopharmacology* **38**, 1105-1112 (2013).
- 1096 36. Buffalo, E. A., Fries, P., Landman, R., Buschman, T. J. & Desimone, R. Laminar differences in  
1097 gamma and alpha coherence in the ventral stream. *Proc Natl Acad Sci U S A* **108**, 11262-11267  
1098 (2011).
- 1099 37. Traub, R. D. et al. Layer 4 pyramidal neuron dendritic bursting underlies a post-stimulus visual  
1100 cortical alpha rhythm. *Commun Biol* **3**, 230 (2020).
- 1101 38. Adams, N. E. et al. GABA-ergic Dynamics in Human Frontotemporal Networks Confirmed by  
1102 Pharmaco-Magnetoencephalography. *J Neurosci* **40**, 1640-1649 (2020).
- 1103 39. Leventhal, A. G. GABA and Its Agonists Improved Visual Cortical Function in Senescent  
1104 Monkeys. *Science* **300**, 812-815 (2003).
- 1105 40. Schmolesky, M. T., Wang, Y., Pu, M. & Leventhal, A. G. Degradation of stimulus selectivity of  
1106 visual cortical cells in senescent rhesus monkeys. *Nat Neurosci* **3**, 384-390 (2000).
- 1107 41. Hall, S. D. et al. The role of GABAergic modulation in motor function related neuronal network  
1108 activity. *Neuroimage* **56**, 1506-1510 (2011).
- 1109 42. Hoshino, O., Zheng, M. & Watanabe, K. Reduction of trial-to-trial perceptual variability by  
1110 intracortical tonic inhibition. *Neural computation* **28**, 187-215 (2016).
- 1111 43. Lalwani, P. et al. Neural distinctiveness declines with age in auditory cortex and is associated  
1112 with auditory GABA levels. *Neuroimage* **201**, 116033 (2019).
- 1113 44. Goh, J. O. Functional Dedifferentiation and Altered Connectivity in Older Adults: Neural  
1114 Accounts of Cognitive Aging. *Aging Dis* **2**, 30-48 (2011).
- 1115 45. Damoiseaux, J. S. Effects of aging on functional and structural brain connectivity. *NeuroImage*  
1116 **160**, 32-40 (2017).
- 1117 46. King, B. R. et al. Age-Related Declines in Motor Performance are Associated With Decreased  
1118 Segregation of Large-Scale Resting State Brain Networks. *Cereb Cortex* **28**, 4390-4402 (2018).
- 1119 47. Moezzi, B. et al. Characterization of Young and Old Adult Brains: An EEG Functional  
1120 Connectivity Analysis. *Neuroscience* **422**, 230-239 (2019).
- 1121 48. Wang, B. et al. Increased Functional Brain Network Efficiency During Audiovisual Temporal  
1122 Asynchrony Integration Task in Aging. *Front Aging Neurosci* **10**, 316 (2018).
- 1123 49. Michely, J. et al. Network connectivity of motor control in the ageing brain. *Neuroimage Clin*  
1124 **18**, 443-455 (2018).
- 1125 50. Oldfield, R. C. The assessment and analysis of handedness: The Edinburgh inventory.  
1126 *Neuropsychologia* **9**, 97-113 (1971).
- 1127 51. Peek, A. L. et al. Brain GABA and glutamate levels across pain conditions: A systematic  
1128 literature review and meta-analysis of 1H-MRS studies using the MRS-Q quality assessment  
1129 tool. *NeuroImage* **210**, 116532 (2020).
- 1130 52. Yousry, T. A. et al. Localization of the motor hand area to a knob on the precentral gyrus. A  
1131 new landmark. *Brain* **120**, 141-157 (1997).
- 1132 53. Baumgarten, T. J. et al. Beta Peak Frequencies at Rest Correlate with Endogenous GABA+/Cr  
1133 Concentrations in Sensorimotor Cortex Areas. *PLoS One* **11**, e0156829 (2016).
- 1134 54. Mescher, M., Merkle, H., Kirsch, J., Garwood, M. & Gruetter, R. Simultaneous in vivo spectral  
1135 editing and water suppression. *NMR in Biomedicine: An International Journal Devoted to the*  
1136 *Development and Application of Magnetic Resonance In Vivo* **11**, 266-272 (1998).

- 1137 55. Edden, R. A., Puts, N. A., Harris, A. D., Barker, P. B. & Evans, C. J. Gannet: A batch-  
1138 processing tool for the quantitative analysis of gamma-aminobutyric acid-edited MR  
1139 spectroscopy spectra. *J Magn Reson Imaging* **40**, 1445-1452 (2014).
- 1140 56. Near, J. et al. Frequency and phase drift correction of magnetic resonance spectroscopy data by  
1141 spectral registration in the time domain. *Magn Reson Med* **73**, 44-50 (2015).
- 1142 57. Mikkelsen, M. et al. Big GABA II: Water-referenced edited MR spectroscopy at 25 research  
1143 sites. *Neuroimage* **191**, 537-548 (2019).
- 1144 58. Rothman, D. L., Petroff, O. A., Behar, K. L. & Mattson, R. H. Localized <sup>1</sup>H NMR  
1145 measurements of gamma-aminobutyric acid in human brain in vivo. *Proc Natl Acad Sci U S A*  
1146 **90**, 5662-5666 (1993).
- 1147 59. Edden, R. A. E., Puts, N. A. J. & Barker, P. B. Macromolecule-suppressed GABA-edited  
1148 magnetic resonance spectroscopy at 3T. *Magnetic resonance in medicine* **68**, 657-661 (2012).
- 1149 60. Harris, A. D., Puts, N. A. J. & Edden, R. A. E. Tissue correction for GABA-edited MRS:  
1150 Considerations of voxel composition, tissue segmentation, and tissue relaxations. *Journal of*  
1151 *Magnetic Resonance Imaging* **42**, 1431-1440 (2015).
- 1152 61. Schöner, G. & Kelso, J. A. Dynamic pattern generation in behavioral and neural systems.  
1153 *Science* **239**, 1513-1520 (1988).
- 1154 62. Delorme, A. & Makeig, S. EEGLAB: an open source toolbox for analysis of single-trial EEG  
1155 dynamics including independent component analysis. *J Neurosci Methods* **134**, 9-21 (2004).
- 1156 63. Oostenveld, R., Fries, P., Maris, E. & Schoffelen, J. M. FieldTrip: Open source software for  
1157 advanced analysis of MEG, EEG, and invasive electrophysiological data. *Comput Intell*  
1158 *Neurosci* **2011**, 156869 (2011).
- 1159 64. Gomez-Herrero, G. et al. Automatic Removal of Ocular Artifacts in the EEG without an EOG  
1160 Reference Channel. *Proceedings of the 7th Nordic Signal Processing Symposium - NORSIG*  
1161 *2006* (2006).
- 1162 65. Chaumon, M., Bishop, D. V. M. & Busch, N. A. A practical guide to the selection of  
1163 independent components of the electroencephalogram for artifact correction. *Journal of*  
1164 *Neuroscience Methods* **250**, 47-63 (2015).
- 1165 66. Iacono, M. I. et al. MIDA: A Multimodal Imaging-Based Detailed Anatomical Model of the  
1166 Human Head and Neck. *PLOS ONE* **10**, e0124126 (2015).
- 1167 67. Samogin, J., Liu, Q., Marino, M., Wenderoth, N. & Mantini, D. Shared and connection-specific  
1168 intrinsic interactions in the default mode network. *NeuroImage* **200**, 474-481 (2019).
- 1169 68. Liu, Q., Ganzetti, M., Wenderoth, N. & Mantini, D. Detecting Large-Scale Brain Networks  
1170 Using EEG: Impact of Electrode Density, Head Modeling and Source Localization. *Front*  
1171 *Neuroinform* **12**, 4 (2018).
- 1172 69. Liu, Q., Farahibozorg, S., Porcaro, C., Wenderoth, N. & Mantini, D. Detecting large-scale  
1173 networks in the human brain using high-density electroencephalography. *Hum Brain Mapp* **38**,  
1174 4631-4643 (2017).
- 1175 70. Taberna, G. A., Marino, M., Ganzetti, M. & Mantini, D. Spatial localization of EEG electrodes  
1176 using 3D scanning. *J Neural Eng* **16**, 026020 (2019).
- 1177 71. Haueisen, J., Ramon, C., Eiselt, M., Brauer, H. & Nowak, H. Influence of tissue resistivities on  
1178 neuromagnetic fields and electric potentials studied with a finite element model of the head.  
1179 *IEEE Transactions on Biomedical Engineering* **44**, 727-735 (1997).
- 1180 72. Vorwerk, J., Aydin, U., Wolters, C. H. & Butson, C. R. Influence of Head Tissue Conductivity  
1181 Uncertainties on EEG Dipole Reconstruction. *frontiers in Neuroscience* **13**, 531 (2019).
- 1182 73. Wolters, C. H., Grasedyck, L. & Hackbusch, W. Efficient computation of lead field bases and  
1183 influence matrix for the FEM-based EEG and MEG inverse problem. *Inverse Problems* **20**,  
1184 1099-1116 (2004).
- 1185 74. Pascual-Marqui, R. D. Discrete, 3D distributed, linear imaging methods of electric neuronal  
1186 activity. Part 1: exact, zero error localization. *arXiv preprint arXiv:0710.3341* (2007).
- 1187 75. Lachaux, J.-P. et al. Studying single-trials of phase synchronous activity in the brain.  
1188 *International Journal of Bifurcation and Chaos* **10**, 2429-2439 (2000).
- 1189 76. Cohen, M. X. Effects of time lag and frequency matching on phase-based connectivity. *Journal*  
1190 *of Neuroscience Methods* **250**, 137-146 (2015).

- 1191 77. Tallon-Baudry & Bertrand. Oscillatory gamma activity in humans and its role in object  
1192 representation. *Trends Cogn Sci* **3**, 151-162 (1999).
- 1193 78. Cohen, M. X. A better way to define and describe Morlet wavelets for time-frequency analysis.  
1194 *Neuroimage* **199**, 81-86 (2019).
- 1195 79. Mormann, F., Lehnertz, K., David, P. & E. Elger, C. Mean phase coherence as a measure for  
1196 phase synchronization and its application to the EEG of epilepsy patients. *Physica D: Nonlinear*  
1197 *Phenomena* **144**, 358-369 (2000).
- 1198 80. Ciuparu, A. & Mureşan, R. C. Sources of bias in single-trial normalization procedures. *Eur J*  
1199 *Neurosci* **43**, 861-869 (2016).
- 1200 81. Funder, D. C. & Ozer, D. J. Evaluating effect size in psychological research: Sense and  
1201 nonsense. *Advances in Methods and Practices in Psychological Science* **2**, 156-168 (2019).
- 1202 82. Chen, H., Cohen, P. & Chen, S. How big is a big odds ratio? Interpreting the magnitudes of  
1203 odds ratios in epidemiological studies. *Communications in Statistics—simulation and*  
1204 *Computation*® **39**, 860-864 (2010).
- 1205 83. Maris, E. & Oostenveld, R. Nonparametric statistical testing of EEG- and MEG-data. *Journal of*  
1206 *Neuroscience Methods* **164**, 177-190 (2007).
- 1207 84. Harrison, D. & Kanji, G. K. The development of analysis of variance for circular data. *Journal*  
1208 *of Applied Statistics* **15**, 197-223 (1988).
- 1209 85. Berens, P. CircStat: a MATLAB toolbox for circular statistics. *J Stat Softw* (2009).
- 1210 86. Agostinelli, C. & Lund, U. R package ‘circular’: Circular Statistics (version 0.4-93). URL  
1211 <https://r-forge.r-project.org/projects/circular> (2013).
- 1212 87. Benjamini, Y. & Yekutieli, D. The control of the false discovery rate in multiple testing under  
1213 dependency. *Annals of statistics* (2001).
- 1214 88. Yuan, Y. & MacKinnon, D. P. Bayesian mediation analysis. *Psychol Methods* **14**, 301-322  
1215 (2009).
- 1216 89. Carpenter, B. et al. Stan: A Probabilistic Programming Language. *Journal of Statistical*  
1217 *Software* **76**, (2017).
- 1218 90. Bürkner, P.-C. brms: An R Package for Bayesian Multilevel Models Using Stan. *Journal of*  
1219 *Statistical Software* **80**, 1-28 (2017).
- 1220 91. Bürkner, P.-C. Advanced Bayesian Multilevel Modeling with the R Package brms. *The R*  
1221 *Journal* **10**, 395 (2018).
- 1222 92. Goodrich B, G. J., Ali I & Brilleman S. rstanarm: Bayesian applied regression modeling via  
1223 Stan. R package version 2.19.3. (2020).
- 1224 93. Makowski, D., Ben-Shachar, M. & Lüdtke, D. bayestestR: Describing Effects and their  
1225 Uncertainty, Existence and Significance within the Bayesian Framework. *Journal of Open*  
1226 *Source Software* **4**, 1541 (2019).
- 1227 94. Makowski, D., Ben-Shachar, M. S., Chen, S. H. A. & Lüdtke, D. Indices of Effect Existence  
1228 and Significance in the Bayesian Framework. *Front Psychol* **10**, 2767 (2019).
- 1229
